# Supplementary material for: Cornification of nail keratinocytes requires autophagy for bulk degradation of intracellular proteins while sparing components of the cytoskeleton
Source: PubMed Central journal article supplement (PMC6373260; doi:10.1007/s10495-018-1505-4), 2018-12-14
Supplement: 10495_2018_1505_MOESM1_ESM.pdf [file 10495_2018_1505_MOESM1_ESM.pdf]

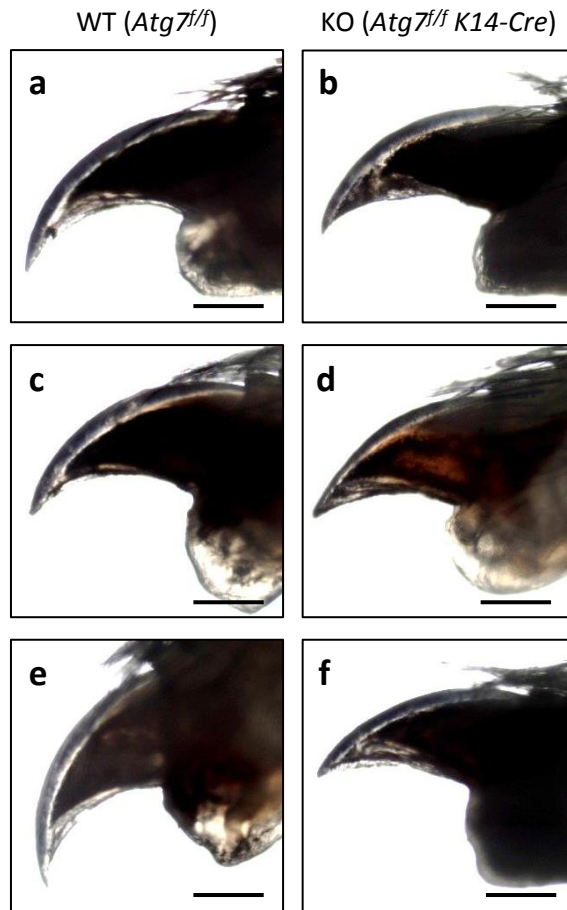

**Supplementary Figure S1. Shape of nails of WT and *Atg7* KO mice.** Toes were prepared from hindlimbs of sacrificed mice (WT: a, c, e; KO: b, d, f) and photographed under a stereomicroscope. Three representative nails per genotype are shown. More than 10 mice per genotype were investigated. There were no consistent differences in nail shape between the genotypes. Size bars, 500  $\mu$ m.

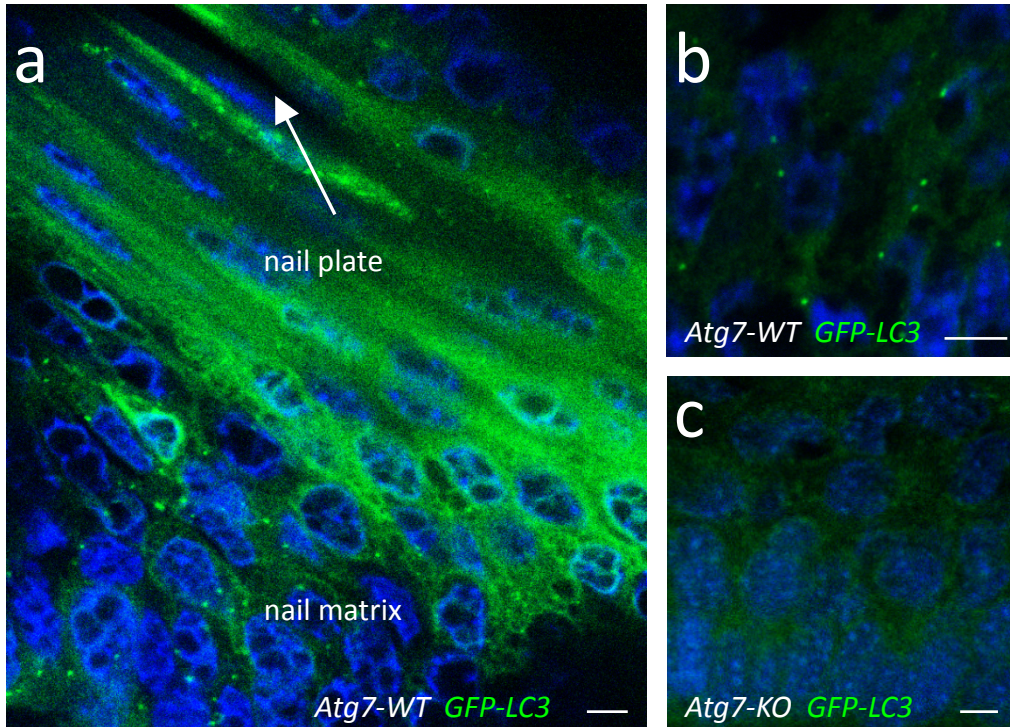

**Supplementary Figure S2. GFP-LC3 puncta indicate autophagosomes in nail matrix keratinocytes of *Atg7<sup>fl/fl</sup> GFP-LC3* but not *Atg7<sup>fl/fl</sup> K14-Cre GFP-LC3* mice.** The transgene *GFP-LC3* (Mizushima et al., 2004), encoding the recombinant fusion of green fluorescent protein (GFP) and the autophagy adapter LC3, was introduced into *Atg7<sup>fl/fl</sup>* and *Atg7<sup>fl/fl</sup> K14-Cre* mice as reported previously (Sukeree et al., 2012). The nail matrix samples of *Atg7<sup>fl/fl</sup> (Atg7-WT) GFP-LC3* (a, b) and *Atg7<sup>fl/fl</sup> K14-Cre (Atg7-KO) GFP-LC3* (c) mice were embedded in optimal cutting temperature (OCT) compound in liquid nitrogen. Cryosections were counterstained with DNA-specific Hoechst dye (blue) and viewed under a laser scanning microscope. GFP-LC3-labeled autophagosomes are visible as green puncta. Note the absence of puncta in the nail matrix of *Atg7-KO GFP-LC3* mice. Scale bars, 5  $\mu\text{m}$ .

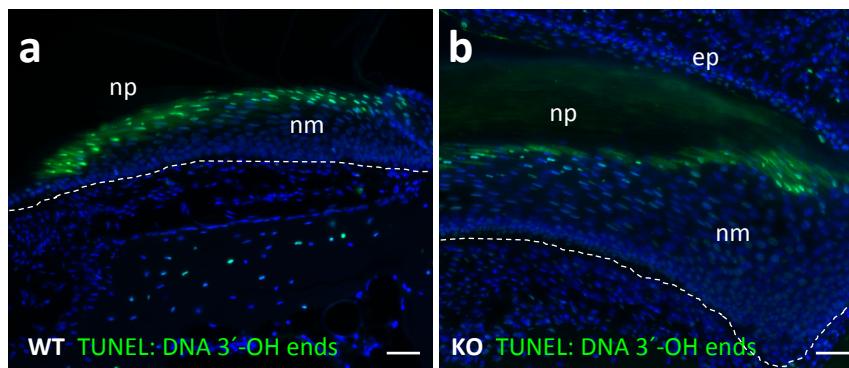

**Supplementary Figure S3. Cell death occurs during cornification of nail keratinocytes but not in cells of the nail matrix in *Atg7<sup>fl/fl</sup>* (WT) and *Atg7<sup>fl/fl</sup> K14-Cre* (KO) mice.** Formaldehyde-fixed and paraffin-embedded toes of WT (a) and KO (b) mice were sectioned and subjected to terminal deoxynucleotidyl transferase dUTP nick end labeling (TUNEL) according to a published protocol (Fischer et al., 2005). DNA 3'-OH ends are labeled green. DNA was labeled with Hoechst dye (blue). The images are representative for n=3 mice per genotype. The dermo-epidermal junction is indicated by a broken white line. ep, eponychium; nm, nail matrix; np, nail plate. Scale bars, 20  $\mu$ m.

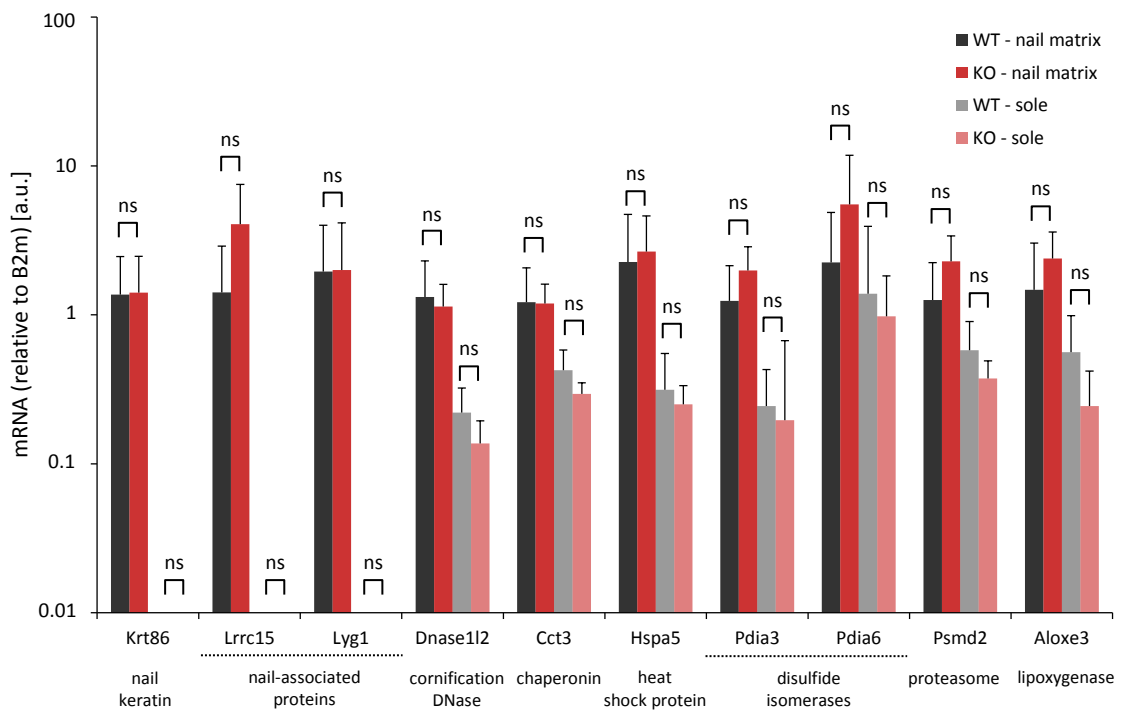

**Supplementary Figure S4. Quantification of mRNAs in the nail matrix and sole skin.** RNA was extracted from the nail matrix (cells attaching to isolated nails) and from the sole skin of WT and KO mice (n=5 per genotype), reverse-transcribed, and subjected to quantitative PCR (qPCR) as described in the Methods section. The mRNA levels of the target genes relative to mRNA of the house-keeping gene *B2m* [29] are shown. qPCR Ct values of *B2m* were not significantly different between WT and KO samples from the same tissue (nail matrix or sole). Bars show means and error bars show standard deviations. a.u., arbitrary units; n.s., not significant ( $P > 0.05$ , 2-sided t-test).

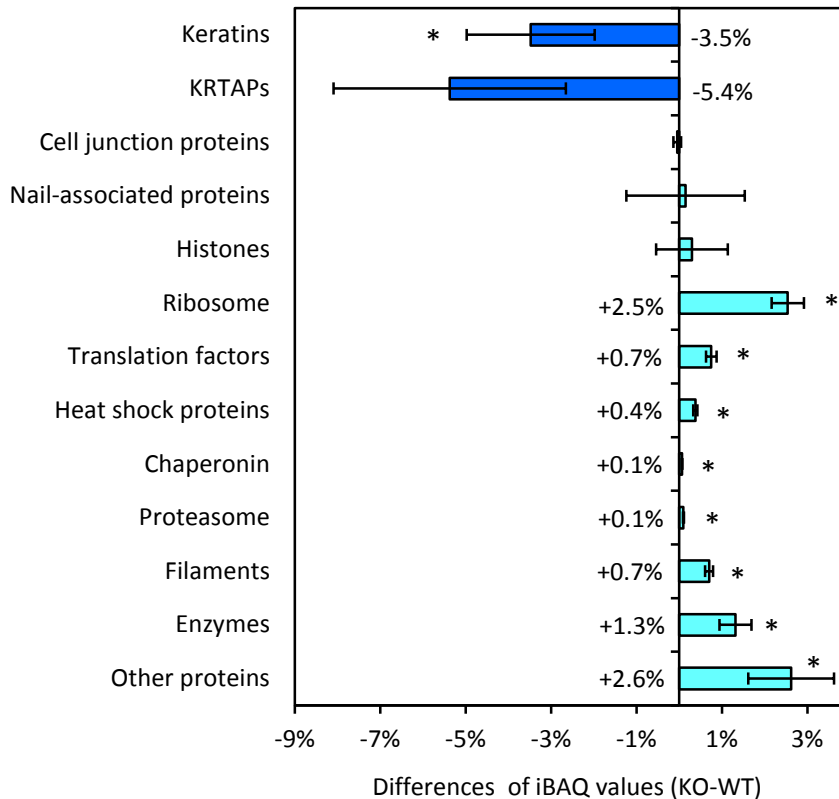

**Supplementary Figure S5. The abundance of non-structural proteins is significantly increased in cornified nails of *Atg7* KO (*Atg7<sup>fl/fl</sup> K14-Cre*) mice.** Bars indicate the difference in the abundance (% of total IBAQ values) of the main protein groups in KO and WT nails, as indicated in Table 1. 2-tailed t-test. \*, significantly different ( $p < 0.05$ , t-test). IBAQ, intensity-based absolute quantification; KO, knockout; KRTAP, keratin-associated protein; WT, wildtype.

| #    | Identified proteins                                                                                     | Protein group            | Accession number         | Symbol                           | WT1      | WT2      | IBAQ     | K01      | K02      | K03      | K04      | Ratio KO/WT |
|------|---------------------------------------------------------------------------------------------------------|--------------------------|--------------------------|----------------------------------|----------|----------|----------|----------|----------|----------|----------|-------------|
| 1    | <b>Cluster of Keratin, type II cuticular Hb1 OS-Mus musculus GN-Krt16 PE-2 SV-2 (KRT16_MOUSE)</b>       | Keratin                  | <b>KRT16_MOUSE [8]</b>   | <b>KRT16 Cluster</b>             | 1,466.10 | 1,235.10 | 1,496.41 | 1,196.11 | 1,306.10 | 1,126.10 | 1,074.10 | 0.86        |
| 1.1  | Keratin, type II cuticular 87 OS-Mus musculus GN-Krt87 PE-2 SV-2                                        | Keratin                  | KRT87_MOUSE              | Krt87                            | 1,436.10 | 1,156.10 | 1,486.10 | 1,146.10 | 1,251.10 | 1,074.10 | 1,074.10 | 0.85        |
| 1.2  | Keratin, type II cuticular Hb5 OS-Mus musculus GN-Krt85 PE-1 SV-2                                       | Keratin                  | KRT85_MOUSE              | Krt85                            | 1,095.10 | 6,896.10 | 9,721.10 | 6,689.10 | 7,256.10 | 6,346.10 | 6,346.10 | 0.79        |
| 1.3  | Keratin, type II cuticular Hb6 OS-Mus musculus GN-Krt86 PE-2 SV-2                                       | Keratin                  | KRT86_MOUSE              | Krt86                            | 1,606.10 | 1,516.10 | 1,727.10 | 1,634.10 | 1,605.10 | 1,345.10 | 1,345.10 | 0.89        |
| 1.4  | Keratin 83 OS-Mus musculus GN-Krt83 PE-1 SV-2                                                           | Keratin                  | KRT83_MOUSE              | Krt83                            | 1,384.10 | 1,384.10 | 1,379.10 | 1,374.10 | 1,332.10 | 1,332.10 | 1,332.10 | 0.86        |
| 1.5  | Keratin, type II cuticular Hb1 OS-Mus musculus GN-Krt81 PE-2 SV-2                                       | Keratin                  | KRT81_MOUSE              | Krt81                            | 1,686.10 | 1,486.10 | 1,728.10 | 1,436.10 | 1,586.10 | 1,176.10 | 1,176.10 | 0.89        |
| 2    | <b>Cluster of Keratin, type I cuticular Ha3 OS-Mus musculus GN-Krt33b PE-1 SV-2 (KRT33b_MOUSE)</b>      | Keratin                  | <b>KRT33b_MOUSE [11]</b> | <b>Krt33b Cluster</b>            | 1,256.10 | 1,226.10 | 1,172.10 | 1,147.10 | 1,076.10 | 1,137.10 | 1,137.10 | 0.85        |
| 2.1  | Keratin, type I cuticular Hb3 OS-Mus musculus GN-Krt33a PE-1 SV-2                                       | Keratin                  | KRT33a_MOUSE             | Krt33a                           | 1,256.10 | 1,226.10 | 1,172.10 | 1,147.10 | 1,076.10 | 1,137.10 | 1,137.10 | 0.85        |
| 2.4  | Keratin, type I cuticular Ha3 OS-Mus musculus GN-Krt33a PE-1 SV-2                                       | Keratin                  | KRT33a_MOUSE             | Krt33a                           | 1,156.10 | 1,065.10 | 1,206.10 | 8,606.10 | 9,976.10 | 9,976.10 | 9,976.10 | 0.86        |
| 3    | <b>Cluster of Keratin, type II cuticular Hb4 OS-Mus musculus GN-Krt4 PE-2 SV-2 (KRT4_MOUSE)</b>         | Keratin                  | <b>KRT4_MOUSE [12]</b>   | <b>Krt4 Cluster</b>              | 1,026.10 | 1,076.10 | 1,086.10 | 1,306.10 | 1,116.10 | 9,982.10 | 9,982.10 | 1.07        |
| 3.1  | Keratin, type II cuticular Hb4 OS-Mus musculus GN-Krt4 PE-2 SV-2                                        | Keratin                  | KRT4_MOUSE               | Krt4                             | 1,716.10 | 1,826.10 | 1,796.10 | 1,826.10 | 1,926.10 | 1,556.10 | 1,556.10 | 0.99        |
| 3.2  | Keratin 90 OS-Mus musculus GN-Krt90 PE-1 SV-2                                                           | Keratin                  | KRT90_MOUSE              | Krt90                            | 9,826.10 | 6,256.10 | 9,796.10 | 1,036.10 | 1,036.10 | 9,516.10 | 9,516.10 | 1.19        |
| 3.3  | Keratin, type I cytoskeletal 6B OS-Mus musculus GN-Krt6 PE-1 SV-2                                       | Keratin                  | KRT6_MOUSE               | Krt6                             | 4,096.10 | 3,986.10 | 4,406.10 | 6,366.10 | 3,766.10 | 4,476.10 | 4,476.10 | 1.15        |
| 3.4  | Keratin, type I cytoskeletal 1A OS-Mus musculus GN-Krt14 PE-1 SV-2                                      | Keratin                  | KRT14_MOUSE              | Krt14                            | 6,356.10 | 5,456.10 | 6,416.10 | 6,586.10 | 3,746.10 | 4,586.10 | 4,586.10 | 0.84        |
| 4.3  | Keratin 15, isoform CRA_1 OS-Mus musculus GN-Krt15 PE-1 SV-2                                            | Keratin                  | KRT15_MOUSE              | Krt15                            | 4,846.10 | 2,576.10 | 4,976.10 | 3,966.10 | 2,136.10 | 2,166.10 | 2,166.10 | 0.67        |
| 5    | Desmoglein OS-Mus musculus GN-Dsg PE-1 SV-2                                                             | Cell junctional proteins | <b>Dsg_MOUSE [5]</b>     | <b>Dsg</b>                       | 9,406.10 | 4,196.10 | 1,126.10 | 1,116.10 | 1,146.10 | 1,236.10 | 1,236.10 | 1.03        |
| 6    | Leucine-rich repeat-containing protein 15 OS-Mus musculus GN-Lrrc15 PE-1 SV-2                           | Nail-associated proteins | <b>Lrrc15_MOUSE</b>      | <b>Lrrc15</b>                    | 5,106.10 | 7,396.10 | 5,356.10 | 4,716.10 | 6,056.10 | 7,416.10 | 7,416.10 | 1.02        |
| 7    | <b>Cluster of Keratin-associated protein 4-16 OS-Mus musculus GN-Krtap4-16 PE-1 SV-1 (Q91W93_MOUSE)</b> | KRTAP                    | <b>Q91W93_MOUSE [13]</b> | <b>Krtap4-16 Cluster</b>         | 2,656.10 | 1,786.10 | 2,756.10 | 2,926.10 | 1,936.10 | 2,006.10 | 2,006.10 | 0.74        |
| 7.1  | Predicted gene 11555 OS-Mus musculus GN-Gm11555 PE-4 SV-1                                               | KRTAP                    | E9PWW3_MOUSE             | Gm11555                          | 2,156.10 | 1,516.10 | 2,206.10 | 2,946.10 | 2,056.10 | 1,556.10 | 1,556.10 | 0.94        |
| 7.2  | Keratin-associated protein 4-16 OS-Mus musculus GN-Krtap4-16 PE-1 SV-1                                  | KRTAP                    | Q1W82_MOUSE              | Krtap4-16                        | 1,316.10 | 5,756.10 | 1,516.10 | 2,936.10 | 7,596.10 | 7,216.10 | 7,216.10 | 0.52        |
| 7.11 | Keratin-associated protein 4-9 OS-Mus musculus GN-Krtap4-9 PE-1 SV-1                                    | KRTAP                    | Q1QA9_MOUSE              | Krtap4-9                         | 2,926.10 | 2,026.10 | 3,126.10 | 2,016.10 | 1,726.10 | 2,006.10 | 2,006.10 | 0.61        |
| 7.12 | Keratin-associated protein 4-7 OS-Mus musculus GN-Krtap4-7 PE-2 SV-1                                    | KRTAP                    | Q9D732_MOUSE             | Krtap4-7                         | 3,696.10 | 2,646.10 | 3,866.10 | 3,466.10 | 2,756.10 | 2,776.10 | 2,776.10 | 0.78        |
| 7.13 | Predicted gene 11554 OS-Mus musculus GN-Gm11554 PE-4 SV-1                                               | KRTAP                    | Q1AQ82_MOUSE             | Gm11554                          | 2,096.10 | 1,336.10 | 2,286.10 | 1,466.10 | 1,016.10 | 1,676.10 | 1,676.10 | 0.78        |
| 7.2  | MCG140230 OS-Mus musculus GN-Gm11596 PE-4 SV-1                                                          | KRTAP                    | Q9V4B7_MOUSE             | Gm11596                          | 2,726.10 | 1,626.10 | 2,846.10 | 2,826.10 | 1,666.10 | 1,846.10 | 1,846.10 | 0.63        |
| 7.3  | Keratin-associated protein 4-6 OS-Mus musculus GN-Krtap4-6 PE-1 SV-1                                    | KRTAP                    | Q3V4B7_MOUSE             | Krtap4-6                         | 3,826.10 | 2,556.10 | 3,936.10 | 2,966.10 | 2,526.10 | 1,486.10 | 1,486.10 | 0.67        |
| 7.5  | Predicted gene 11563 OS-Mus musculus GN-Gm11563 PE-4 SV-1                                               | KRTAP                    | Q1A90_MOUSE              | Gm11563                          | 2,946.10 | 1,886.10 | 2,856.10 | 2,716.10 | 2,976.10 | 1,966.10 | 1,966.10 | 0.71        |
| 7.1  | Keratin-associated protein 4-1 OS-Mus musculus GN-Krtap4-1 PE-2 SV-1                                    | KRTAP                    | Q3WA1_MOUSE              | Krtap4-1                         | 3,356.10 | 2,536.10 | 3,496.10 | 3,516.10 | 2,366.10 | 1,706.10 | 1,706.10 | 1.05        |
| 7.8  | Keratin-associated protein 4-2 OS-Mus musculus GN-Krtap4-2 PE-4 SV-1                                    | KRTAP                    | Q1A95_MOUSE              | Krtap4-2                         | 2,306.10 | 1,626.10 | 2,376.10 | 2,196.10 | 2,436.10 | 1,866.10 | 1,866.10 | 1.00        |
| 7.9  | MCG140213 OS-Mus musculus GN-Gm11596 PE-4 SV-1                                                          | KRTAP                    | Q1A90_MOUSE              | Gm11596                          | 1,916.10 | 1,316.10 | 2,116.10 | 1,286.10 | 1,026.10 | 8,006.10 | 8,006.10 | 0.58        |
| 8    | Krtap4-2 protein OS-Mus musculus GN-Gm11562 PE-2 SV-1                                                   | KRTAP                    | ADPK5_MOUSE [1+]         | Gm11562                          | 1,206.10 | 8,246.10 | 8,846.10 | 8,686.10 | 9,146.10 | 1,026.10 | 1,026.10 | 1.00        |
| 9    | <b>Cluster of Keratin, type I cuticular Ha2 OS-Mus musculus GN-Krt36 PE-1 SV-1 (KRT36_MOUSE)</b>        | Keratin                  | <b>KRT36_MOUSE [5]</b>   | <b>Krt36 Cluster</b>             | 3,416.10 | 4,376.10 | 3,616.10 | 3,476.10 | 3,486.10 | 3,526.10 | 3,526.10 | 0.92        |
| 9.1  | Keratin, type I cuticular Ha2 OS-Mus musculus GN-Krt36 PE-1 SV-1                                        | Keratin                  | KRT36_MOUSE              | Krt36                            | 3,416.10 | 4,376.10 | 3,616.10 | 3,476.10 | 3,486.10 | 3,526.10 | 3,526.10 | 0.92        |
| 9.3  | Keratin, type I cuticular Ha2 OS-Mus musculus GN-Krt32 PE-1 SV-1                                        | Keratin                  | BIAT75_MOUSE [2+]        | Krt32                            | 7,096.10 | 6,206.10 | 7,166.10 | 6,046.10 | 5,356.10 | 5,796.10 | 5,796.10 | 0.54        |
| 10   | Keratin-associated protein 6-5 OS-Mus musculus GN-Krtap6-5 PE-2 SV-1                                    | KRTAP                    | KR66_MOUSE [1+]          | Krtap6-5                         | 5,206.10 | 4,436.10 | 5,546.10 | 4,656.10 | 4,106.10 | 4,756.10 | 4,756.10 | 0.89        |
| 11   | 2310051N02Rk protein OS-Mus musculus GN-Dntrlk PE-1 SV-1                                                | Actin                    | ACTC_MOUSE [1]           | Actc                             | 2,566.10 | 4,136.10 | 2,596.10 | 2,596.10 | 2,596.10 | 2,596.10 | 2,596.10 | 0.71        |
| 12   | <b>Cluster of Actin, alpha cardiac muscle 1 OS-Mus musculus GN-Actc1 PE-1 SV-1 (ACTC_MOUSE)</b>         | Actin                    | <b>ACTC_MOUSE [4]</b>    | <b>Actc Cluster</b>              | 2,726.10 | 3,996.10 | 2,906.10 | 8,166.10 | 8,306.10 | 9,546.10 | 9,546.10 | 0.71        |
| 12.1 | Actin, alpha cardiac muscle 1 OS-Mus musculus GN-Actc1 PE-1 SV-1                                        | Actin                    | ACTC_MOUSE [1+]          | Actc                             | 1,926.10 | 2,556.10 | 2,176.10 | 8,816.10 | 5,376.10 | 6,136.10 | 6,136.10 | 2.61        |
| 12.2 | Actin, cytoplasmic 1 OS-Mus musculus GN-Actb PE-1 SV-1                                                  | Actin                    | ACTB_MOUSE               | Actb                             | 3,126.10 | 4,706.10 | 3,266.10 | 9,376.10 | 9,796.10 | 1,136.10 | 1,136.10 | 2.75        |
| 12.3 | Actin, cytoplasmic 2 OS-Mus musculus GN-Acta2 PE-1 SV-1                                                 | Actin                    | ACTA2_MOUSE              | Acta2                            | 3,126.10 | 4,706.10 | 3,266.10 | 9,376.10 | 9,796.10 | 1,136.10 | 1,136.10 | 2.75        |
| 13   | <b>Cluster of Junction plakoglobin OS-Mus musculus GN-Jup PE-1 SV-1 (PLAK_MOUSE)</b>                    | Cell junctional proteins | <b>PLAK_MOUSE [2]</b>    | <b>Jup Cluster</b>               | 1,856.10 | 3,106.10 | 2,426.10 | 1,296.10 | 2,376.10 | 1,496.10 | 1,496.10 | 0.70        |
| 13.1 | Junction plakoglobin OS-Mus musculus GN-Jup PE-1 SV-1                                                   | Cell junctional proteins | PLAK_MOUSE               | Jup                              | 1,856.10 | 3,106.10 | 2,426.10 | 2,396.10 | 2,376.10 | 2,666.10 | 2,666.10 | 1.01        |
| 13.2 | Catenin beta-3 OS-Mus musculus GN-Cnnb3 PE-1 SV-1                                                       | Cell junctional proteins | CNNB3_MOUSE              | Cnnb3                            | 0        | 0        | 0        | 0        | 0        | 0        | 0        | >0.00       |
| 14   | <b>Cluster of MCG128973 OS-Mus musculus GN-Gm128973 PE-1 SV-1 (Q9D676_MOUSE)</b>                        | KRTAP                    | <b>Q9D676_MOUSE [5]</b>  | <b>Krtap2310051N02Rk Cluster</b> | 3,526.10 | 2,656.10 | 3,676.10 | 4,196.10 | 3,626.10 | 2,656.10 | 2,656.10 | 1.08        |
| 14.1 | MCG128973 OS-Mus musculus GN-Gm128973 PE-1 SV-1                                                         | KRTAP                    | Q9D676_MOUSE             | Krtap2310051N02Rk                | 3,526.10 | 2,656.10 | 3,676.10 | 4,196.10 | 3,626.10 | 2,656.10 | 2,656.10 | 1.08        |
| 14.2 | Predicted gene 5965 OS-Mus musculus GN-Gm5965 PE-2 SV-1                                                 | KRTAP                    | DZ727A_MOUSE             | Krtap5965                        | 3,306.10 | 2,486.10 | 3,886.10 | 3,326.10 | 3,496.10 | 2,616.10 | 2,616.10 | 0.99        |
| 15   | Keratin-associated protein 13-1 OS-Mus musculus GN-Krtap13-1 PE-1 SV-1                                  | KRTAP                    | G9K931_MOUSE             | Krtap13-1                        | 2,566.10 | 3,916.10 | 2,596.10 | 2,596.10 | 3,436.10 | 3,626.10 | 3,626.10 | 0.99        |
| 16   | Elongation factor 2 OS-Mus musculus GN-Ef2 PE-1 SV-2                                                    | Translation factors      | EF2_MOUSE                | Ef2                              | 1,126.10 | 1,366.10 | 1,226.10 | 2,096.10 | 2,436.10 | 2,226.10 | 2,226.10 | 1.06        |
| 17   | Elongation factor 1-alpha OS-Mus musculus GN-Ef1a PE-1 SV-2                                             | Translation factors      | EF1A_MOUSE               | Ef1a                             | 3,566.10 | 4,416.10 | 4,146.10 | 8,786.10 | 8,266.10 | 7,346.10 | 7,346.10 | 1.03        |
| 18   | Selenium-binding protein 1 OS-Mus musculus GN-Selebp1 PE-1 SV-2                                         | Other proteins           | SELEBP1_MOUSE            | Selebp1                          | 1,126.10 | 1,606.10 | 1,246.10 | 2,396.10 | 3,776.10 | 3,336.10 | 3,336.10 | 1.25        |
| 19   | Serum albumin OS-Mus musculus GN-Salb PE-1 SV-2                                                         | Other proteins           | SALB_MOUSE               | Salb                             | 5,246.10 | 4,926.10 | 6,016.10 | 1,006.10 | 1,406.10 | 1,406.10 | 1,406.10 | 2.42        |
| 20   | <b>Cluster of Histone H2B type 1-8 OS-Mus musculus GN-Hist1h2b PE-1 SV-3 (H2B1_MOUSE)</b>               | Histones                 | <b>H2B1_MOUSE [10]</b>   | <b>Hist1h2b Cluster</b>          | 8,146.10 | 1,146.10 | 8,246.10 | 8,826.10 | 9,056.10 | 9,326.10 | 9,326.10 | 0.94        |
| 20.1 | Histone H2B type 1-8 OS-Mus musculus GN-Hist1h2b PE-1 SV-3                                              | Histones                 | H2B1_MOUSE (3+)          | Hist1h2b                         | 8,146.10 | 1,146.10 | 8,246.10 | 8,826.10 | 9,056.10 | 9,326.10 | 9,326.10 | 0.94        |
| 20.2 | Histone H2B type 1-7/G OS-Mus musculus GN-Hist1h2b PE-1 SV-3                                            | Histones                 | H2B1C_MOUSE [5+]         | Hist1h2bc                        | 8,146.10 | 1,146.10 | 8,246.10 | 8,826.10 | 9,056.10 | 9,326.10 | 9,326.10 | 0.94        |
| 21   | Keratin-associated protein 1-1 OS-Mus musculus GN-Krtap1-1 PE-1 SV-2                                    | Keratin                  | KRT1_MOUSE               | Krt1                             | 1,226.10 | 1,106.10 | 1,576.10 | 1,516.10 | 7,536.10 | 8,026.10 | 8,026.10 | 1.04        |
| 22   | Keratin, type I cytoskeletal 10 OS-Mus musculus GN-Krt10 PE-1 SV-1                                      | Keratin                  | AZ513_MOUSE (4+)         | Krt10                            | 6,146.10 | 5,946.10 | 5,356.10 | 5,586.10 | 2,396.10 | 8,466.10 | 8,466.10 | 0.64        |
| 23   | RIKEN cDNA 2310034C09 OS-Mus musculus GN-2310034C09Rk PE-1 SV-1                                         | KRTAP                    | Q9D74E_MOUSE             | Krtap2310034C09Rk                | 1,866.10 | 1,856.10 | 2,036.10 | 1,596.10 | 1,986.10 | 1,366.10 | 1,366.10 | 0.95        |
| 25   | Keratin-associated protein 13 OS-Mus musculus GN-Krtap13 PE-2 SV-1                                      | KRTAP                    | OB879_MOUSE              | Krtap13                          | 3,456.10 | 2,726.10 | 3,536.10 | 3,306.10 | 3,646.10 | 2,306.10 | 2,306.10 | 0.95        |
| 26   | Lysosome glycoprotein OS-Mus musculus GN-Lgpb PE-2 SV-1                                                 | Nail-associated proteins | LGPB_MOUSE               | Lgpb                             | 4,496.10 | 1,626.10 | 6,416.10 | 7,006.10 | 7,186.10 | 7,186.10 | 7,186.10 | 0.91        |
| 27   | 14-3-3 protein sigma OS-Mus musculus GN-Sfn PE-1 SV-2                                                   | Other proteins           | SFN_MOUSE                | Sfn                              | 1,726.10 | 3,646.10 | 2,256.10 | 4,966.10 | 5,316.10 | 6,186.10 | 6,186.10 | 1.01        |
| 28   | Histone H4 OS-Mus musculus GN-Hist1h4 PE-1 SV-2                                                         | Histones                 | H4_MOUSE                 | Hist1h4a                         | 1,546.10 | 1,966.10 | 1,756.10 | 1,846.10 | 1,806.10 | 1,856.10 | 1,856.10 | 1.05        |
| 29   | <b>Cluster of Tubulin alpha 1C chain OS-Mus musculus GN-Tubalc1 PE-1 SV-1 (TBA1C_MOUSE)</b>             | Filaments                | <b>TBA1C_MOUSE [3]</b>   | <b>Tubalc1 Cluster</b>           | 5,776.10 | 9,776.10 | 7,716.10 | 9,736.10 | 1,026.10 | 1,066.10 | 1,066.10 | 1.23        |
| 29.1 | Tubulin alpha 1C chain OS-Mus musculus GN-Tubalc1 PE-1 SV-1                                             | Filaments                | TBA1C_MOUSE [3]          | Tubalc1                          | 5,776.10 | 9,776.10 | 7,716.10 | 9,736.10 | 1,026.10 | 1,066.10 | 1,066.10 | 1.23        |
| 29.2 | Tubulin alpha chain (Fragment) OS-Mus musculus GN-Tubalpha PE-1 SV-1                                    | Fragments                | A0A0A0A0AS_MOUSE [1+]    | Tubalpha                         | 5,176.10 | 8,866.10 | 6,986.10 | 7,226.10 | 9,006.10 | 9,356.10 | 9,356.10 | 1.22        |
| 30   | Galactin OS-Mus musculus GN-Lgal7 PE-1 SV-1                                                             | Other proteins           | LGA7_MOUSE               | Lgal7                            | 5,056.10 | 7,166.10 | 6,686.10 | 7,946.10 | 8,316.10 | 1,166.10 | 1,166.10 | 1.49        |
| 31   | Pyruvate kinase PRM OS-Mus musculus GN-Pfkfb1 PE-1 SV-4                                                 | Enzymes                  | PFKFB1_MOUSE             | Pfkfb1                           | 2,896.10 | 4,146.10 | 4,146.10 | 1,536.10 | 1,246.10 | 1,086.10 | 1,086.10 |             |

| #     | Identified proteins                                                                         | Protein group            | Accession number           | Symbol           | WT1       | WT2       | WT3       | KO1         | KO2        | KO3        | Ratio KO/WT |
|-------|---------------------------------------------------------------------------------------------|--------------------------|----------------------------|------------------|-----------|-----------|-----------|-------------|------------|------------|-------------|
| 110   | Keratin, Type I cytoskeletal 24 OS-Mus musculus GN-Krt24 PE=1 Sv-2                          | Keratins                 | K24_MOUSE                  | Krt24            | 4,905,408 | 2,046,088 | 5,205,408 | 3,756,088   | 2,076,488  | 1,646,088  | 0.651       |
| 111   | Phosphotyrosine kinase 1 OS-Mus musculus GN-HPK1 PE=1 Sv-4                                  | Enzymes                  | PKD3_MOUSE                 | Hpk1             | 3,378,720 | 3,568,480 | 3,756,480 | 3,842,480   | 4,788,480  | 2,244,480  | 0.583       |
| 112   | RIKEN cDNA 23107919G9 gene OS-Mus musculus GN-23107919G9R1K9 PE=1 Sv-1                      | Keratin                  | KRC24_MOUSE                | Krtap23107919G9  | 2,848,408 | 1,818,408 | 2,588,408 | 1,688,408   | 1,698,408  | 3,328,408  | 0.91        |
| 114   | Annexin A1 OS-Mus musculus GN-Anx1 PE=1 Sv-2                                                | Other proteins           | ANXA1_MOUSE                | Anxa1            | 1,611,407 | 2,176,407 | 2,181,407 | 2,441,407   | 2,628,407  | 3,576,407  | 1.61        |
| 115   | 40S ribosomal protein S16 OS-Mus musculus GN-Rps16 PE=1 Sv-4                                | Ribosome                 | R16_MOUSE                  | Rps16            | 3,196,407 | 4,136,407 | 4,374,407 | 3,966,407   | 7,985,407  | 6,736,407  | 1.61        |
| 116   | 60S ribosomal protein L16 OS-Mus musculus GN-Rpl16 PE=1 Sv-2                                | Ribosome                 | R16L_MOUSE                 | Rpl16            | 1,682,407 | 2,622,407 | 2,632,407 | 2,632,407   | 2,632,407  | 2,632,407  | 1.18        |
| 117   | 78 kDa glucocorticoid-induced protein OS-Mus musculus GN-Hspa6 PE=1 Sv-1                    | Heat shock proteins      | GRP78_MOUSE                | Hspa6            | 911,400   | 1,511,400 | 1,111,400 | 1,481,400   | 4,356,400  | 4,846,400  | 0.96        |
| 118   | Cluster of Predicted gene 11368 OS-Mus musculus GN-Gm11368 PE=1 Sv-1 (A2AMM2_MOUSE)         | KRTAP                    | A2AMM2_MOUSE [2]           | Krtap Gm11368 Cl | 2,766,408 | 1,126,408 | 1,866,408 | 1,908,408   | 2,288,408  | 1,288,408  | 0.95        |
| 118.1 | Predicted gene 11368 OS-Mus musculus GN-Gm11368 PE=1 Sv-1                                   | KRTAP                    | A2AMM2_MOUSE [2]           | Krtap Gm11368 Cl | 2,766,408 | 1,126,408 | 1,866,408 | 1,908,408   | 2,288,408  | 1,288,408  | 0.95        |
| 118.2 | Keratin-associated protein 9-1 OS-Mus musculus GN-Krtap9-1 PE=2 Sv-1                        | KRTAP                    | Q54526_MOUSE               | Krtap9-1         | 2,222,408 | 8,836,407 | 1,332,408 | 1,522,408   | 1,838,408  | 1,012,408  | 0.93        |
| 119   | Protein-glutamine gamma-glutamyltransferase 1 OS-Mus musculus GN-Tgm1 PE=1 Sv-1             | Enzymes                  | A0ADR4293_MOUSE (+1)       | Tgm1             | 1,411,407 | 2,136,407 | 1,301,407 | 1,181,407   | 1,076,407  | 1,761,407  | 0.82        |
| 120   | Eukaryotic translation initiation factor 3 subunit A OS-Mus musculus GN-EIf3A PE=1 Sv-1     | Translation factors      | EIf3A_MOUSE                | EIf3a            | 262,400   | 317,700   | 234,900   | 1,121,400   | 781,300    | 851,700    | 3.38        |
| 121   | Cluster of Non-predicted gene 20390 OS-Mus musculus GN-Gm20390 PE=3 Sv-4 (E9PZ7_MOUSE)      | Enzymes                  | A2AMM2_MOUSE [2]           | NDK Gm20390 Cl   | 1,806,407 | 2,938,407 | 2,028,407 | 6,351,407   | 6,351,407  | 7,928,407  | 3.40        |
| 121.1 | Nucleoside diphosphate kinase OS-Mus musculus GN-Gm20390 PE=3 Sv-4                          | Enzymes                  | E9PZ7_MOUSE                | NDK Gm20390 Cl   | 1,806,407 | 2,938,407 | 2,028,407 | 6,351,407   | 6,351,407  | 7,928,407  | 3.40        |
| 121.2 | Nucleoside diphosphate kinase OS-Mus musculus GN-Nme1 PE=1 Sv-1                             | Enzymes                  | NDKA_MOUSE                 | Nme1             | 2,056,407 | 2,511,407 | 2,371,407 | 5,351,407   | 6,331,407  | 8,577,407  | 2.92        |
| 122   | Cluster of ADP/ATP translocase 2 OS-Mus musculus GN-Nme1 PE=1 Sv-1 (ADT2_MOUSE)             | Enzymes                  | ADT2_MOUSE [2]             | Slc25a5 Cluster  | 1,687,407 | 2,241,407 | 2,051,407 | 2,981,407   | 2,891,407  | 2,581,407  | 1.42        |
| 122.1 | ADP/ATP translocase 2 OS-Mus musculus GN-Slc25a5 PE=1 Sv-1                                  | Enzymes                  | ADT2_MOUSE [2]             | Slc25a5 Cluster  | 1,687,407 | 2,241,407 | 2,051,407 | 2,981,407   | 2,891,407  | 2,581,407  | 1.42        |
| 122.2 | ADP/ATP translocase 1 OS-Mus musculus GN-Slc25a4 PE=1 Sv-4                                  | Enzymes                  | ADT1_MOUSE                 | Slc25a4          | 1,385,407 | 1,876,407 | 1,631,407 | 2,451,407   | 2,571,407  | 1,941,407  | 1.43        |
| 123   | 60S acidic ribosomal protein P2 OS-Mus musculus GN-Rplp2 PE=1 Sv-3                          | Ribosome                 | Rplp2_MOUSE                | Rplp2            | 9,251,407 | 1,328,407 | 7,361,407 | 1,458,407   | 1,521,407  | 1,811,407  | 1.60        |
| 124   | Cluster of ADP-ribosylation factor 1 OS-Mus musculus GN-Arf1 PE=1 Sv-2 (ARF1_MOUSE)         | Other proteins           | ARF1_MOUSE [3]             | Arf1 Cluster     | 1,631,407 | 2,941,407 | 1,831,407 | 4,581,407   | 6,151,407  | 5,071,407  | 2.47        |
| 124.1 | ADP-ribosylation factor 1 OS-Mus musculus GN-Arf1 PE=1 Sv-2                                 | Other proteins           | ARF1_MOUSE (+1)            | Arf1 Cluster     | 1,631,407 | 2,941,407 | 1,831,407 | 4,581,407   | 6,151,407  | 5,071,407  | 2.47        |
| 124.2 | ADP-ribosylation factor 4 OS-Mus musculus GN-Arf4 PE=1 Sv-1                                 | Other proteins           | ARF4_MOUSE                 | Arf4             | 1,221,407 | 2,681,407 | 1,631,407 | 3,801,407   | 5,441,407  | 4,751,407  | 2.53        |
| 125   | Eukaryotic translation initiation factor 5A-1 OS-Mus musculus GN-EIf5A PE=1 Sv-2            | Translation factors      | EIf5A_MOUSE                | EIf5a            | 1,081,408 | 1,536,408 | 1,431,408 | 1,461,408   | 2,161,408  | 2,371,408  | 1.48        |
| 126   | Tyrosophosphatase 1 OS-Mus musculus GN-PTP1 PE=1 Sv-4                                       | Enzymes                  | TP5_MOUSE                  | TP51             | 995,200   | 2,031,400 | 1,011,400 | 1,361,400   | 4,021,400  | 3,771,400  | 3.03        |
| 128   | Wiscott Aldrich syndrome protein OS-Mus musculus GN-WAS PE=1 Sv-2                           | Enzymes                  | OMPA_MOUSE                 | Was              | 1,201,407 | 2,891,407 | 1,721,407 | 4,331,407   | 4,721,407  | 4,721,407  | 1.07        |
| 129   | Transmembrane protease serine OS-Mus musculus GN-Tmprs11c PE=1 Sv-1                         | Enzymes                  | A0ADG2177_MOUSE (+1)       | Tmprs11c         | 2,666,407 | 3,401,407 | 2,981,407 | 1,971,407   | 2,451,407  | 2,861,407  | 0.80        |
| 130   | 60S ribosomal protein L23 OS-Mus musculus GN-Rpl23 PE=1 Sv-1                                | Ribosome                 | R23_MOUSE                  | Rpl23            | 3,521,407 | 4,581,407 | 3,461,407 | 5,791,407   | 7,641,407  | 8,711,407  | 1.67        |
| 131   | 60S ribosomal protein L18 OS-Mus musculus GN-Rpl18 PE=1 Sv-3                                | Ribosome                 | R18_MOUSE                  | Rpl18            | 6,501,407 | 5,401,407 | 5,651,407 | 6,451,407   | 6,551,407  | 6,051,407  | 0.92        |
| 132   | Prolyl endopeptidase OS-Mus musculus GN-Prpp PE=1 Sv-1                                      | Enzymes                  | PRKE_MOUSE                 | Prpp             | 149,700   | 80,900    | 373,500   | 1,111,400   | 2,211,400  | 1,561,400  | 8.09        |
| 133   | Peroleptin-1 OS-Mus musculus GN-Prdx1 PE=1 Sv-1                                             | Other proteins           | PRDX1_MOUSE                | Prdx1            | 2,191,407 | 4,511,407 | 3,271,407 | 7,111,407   | 7,211,407  | 8,611,407  | 2.36        |
| 134   | 60S ribosomal protein L12 OS-Mus musculus GN-Rpl12 PE=1 Sv-2                                | Ribosome                 | R12_MOUSE                  | Rpl12            | 4,741,407 | 3,571,407 | 4,691,407 | 4,931,407   | 1,021,407  | 1,091,407  | 2.34        |
| 135   | Keratin-associated protein 2 OS-Mus musculus GN-Krtap2 PE=1 Sv-1                            | Other proteins           | A0ADR79175_MOUSE (+1)      | Krtap2           | 2,751,409 | 1,451,409 | 2,791,409 | 4,041,409   | 3,911,409  | 1,371,409  | 1.04        |
| 136   | Fructose-bisphosphate aldolase A OS-Mus musculus GN-Aldoa PE=1 Sv-2                         | Enzymes                  | ALDOA_MOUSE                | Aldoa            | 9,917,000 | 5,374,000 | 8,417,000 | 3,841,400   | 3,951,400  | 2,271,400  | 4.05        |
| 137   | Crystallin beta-gamma domain-containing 1 OS-Mus musculus GN-Crybg1 PE=1 Sv-1               | Other proteins           | A0ADG3252_MOUSE (+1)       | Crybg1           | 3,723,000 | 9,849,000 | 4,734,000 | 5,572,000   | 45,272,000 | 65,204,000 | 1.49        |
| 138   | Profilin-1 OS-Mus musculus GN-Pfn1 PE=1 Sv-2                                                | Other proteins           | PFN1_MOUSE                 | Pfn1             | 2,751,007 | 2,801,407 | 1,961,407 | 5,341,407   | 5,401,407  | 4,441,407  | 2.09        |
| 139   | Alpha globin 1 OS-Mus musculus GN-Hba1 PE=1 Sv-1                                            | Other proteins           | GYG1_MOUSE                 | Hba1             | 1,011,408 | 1,371,408 | 1,451,408 | 1,371,408   | 2,331,408  | 2,131,408  | 1.04        |
| 140   | 60S ribosomal protein S19 OS-Mus musculus GN-Rps19 PE=1 Sv-3                                | Ribosome                 | RS19_MOUSE                 | Rps19            | 1,901,407 | 2,091,407 | 2,071,407 | 4,471,407   | 4,341,407  | 3,351,407  | 2.01        |
| 141   | MCG120169 OS-Mus musculus GN-231005C090R1K PE=1 Sv-1                                        | Other proteins           | G5823_MOUSE                | Clorf68/LCE      | 1,121,408 | 1,011,408 | 1,071,408 | 1,371,408   | 1,461,408  | 8,051,408  | 1.13        |
| 142   | Predicted gene 12020 OS-Mus musculus GN-Gm12020 PE=1 Sv-1                                   | Ribosome                 | RFPV7_MOUSE (+2)           | Rpl8             | 4,431,407 | 4,991,407 | 5,491,407 | 9,061,407   | 8,821,407  | 7,531,407  | 1.77        |
| 143   | 60S ribosomal protein S18 OS-Mus musculus GN-Rps18 PE=1 Sv-3                                | Ribosome                 | R18_MOUSE                  | Rpl18            | 1,701,407 | 1,901,407 | 1,541,407 | 4,491,407   | 5,451,407  | 3,941,407  | 1.94        |
| 144   | 40S ribosomal protein S6 OS-Mus musculus GN-Rps6 PE=1 Sv-1                                  | Ribosome                 | RSE_MOUSE                  | Rps6             | 3,001,407 | 5,691,407 | 2,831,407 | 6,551,407   | 7,071,407  | 8,761,407  | 1.91        |
| 145   | 40S ribosomal protein S5 (Fragment) OS-Mus musculus GN-Rps5 PE=1 Sv-1                       | Ribosome                 | D3YMM6_MOUSE (+2)          | Rps5             | 5,921,407 | 1,771,408 | 8,161,408 | 1,581,408   | 2,481,408  | 2,101,408  | 1.97        |
| 146   | Calmodulin-4 OS-Mus musculus GN-Calm4 PE=1 Sv-2                                             | Other proteins           | CALM4_MOUSE                | Calm4            | 4,571,407 | 5,211,407 | 3,731,407 | 5,341,407   | 3,771,407  | 9,181,407  | 1.35        |
| 147   | Cofilin-1 OS-Mus musculus GN-Cfl1 PE=1 Sv-3                                                 | Other proteins           | COF1_MOUSE                 | Cfl1             | 3,951,407 | 4,851,407 | 4,691,407 | 5,711,407   | 5,141,407  | 3,761,407  | 1.21        |
| 148   | Rab GDP dissociation inhibitor beta OS-Mus musculus GN-Gdi2 PE=1 Sv-1                       | Other proteins           | sp Q61598 GDI2_MOUSE       | Gdi2             | 9,931,000 | 2,541,407 | 1,091,407 | 7,271,407   | 3,521,407  | 3,041,407  | 2.99        |
| 149   | Dstn OS-Mus musculus GN-Dstn PE=1 Sv-1                                                      | Other proteins           | DEST_MOUSE                 | Dstn             | 1,881,407 | 3,721,407 | 1,071,407 | 6,661,407   | 7,221,407  | 8,161,407  | 2.19        |
| 150   | Gad65 OS-Mus musculus GN-Gad65 PE=1 Sv-1                                                    | Other proteins           | GAD65_MOUSE                | Gad65            | 2,011,407 | 4,071,407 | 2,351,407 | 3,921,407   | 4,101,407  | 3,761,407  | 2.47        |
| 151   | 60S ribosomal protein L30 OS-Mus musculus GN-Rpl30 PE=1 Sv-1                                | Ribosome                 | RL30_MOUSE                 | Rpl30            | 4,201,407 | 7,901,407 | 4,311,407 | 8,411,407   | 9,091,407  | 1,111,407  | 1.74        |
| 152   | Ubiquitin-40S ribosomal protein S27a OS-Mus musculus GN-Rps27a PE=1 Sv-2                    | Ribosome                 | RS27A_MOUSE                | Rps27a           | 5,281,407 | 8,291,407 | 4,271,407 | 9,101,407   | 6,471,407  | 3,171,407  | 1.37        |
| 153   | Insulin 3B of Desmodulin 3 OS-Mus musculus GN-Dsc3                                          | Cell junctional proteins | sp HS88522 DSC3_MOUSE (+1) | Dsc3             | 648,700   | 7,536,700 | 1,611,400 | 1,271,400   | 1,241,400  | 1,001,400  | 1.17        |
| 154   | Homophilin OS-Mus musculus GN-Hom PE=1 Sv-1                                                 | Other proteins           | HMN1_MOUSE                 | Hom              | 3,081,407 | 4,841,407 | 2,931,407 | 3,841,407   | 3,201,407  | 9,951,407  | 2.89        |
| 155   | Heat shock 70 kDa protein 1A OS-Mus musculus GN-Hspa1A PE=1 Sv-2                            | Heat shock proteins      | HSPA1A_MOUSE (+1)          | Hspa1a           | 1,511,407 | 1,791,407 | 1,561,407 | 3,341,407   | 3,371,407  | 3,471,407  | 2.09        |
| 156   | 60S ribosomal protein L8 OS-Mus musculus GN-Rpl8 PE=1 Sv-2                                  | Ribosome                 | RL8_MOUSE                  | Rpl8             | 1,741,407 | 1,681,407 | 2,771,407 | 1,121,407   | 3,181,407  | 4,021,407  | 1.98        |
| 157   | 60S acidic ribosomal protein P1 OS-Mus musculus GN-Rplp1 PE=1 Sv-1                          | Ribosome                 | R1P1_MOUSE                 | Rplp1            | 1,411,408 | 3,381,408 | 2,051,408 | 3,121,408   | 3,641,408  | 4,021,408  | 1.58        |
| 158   | 60S ribosomal protein L19 OS-Mus musculus GN-Rpl19 PE=1 Sv-1                                | Ribosome                 | RL19_MOUSE (+1)            | Rpl19            | 3,411,407 | 3,431,407 | 1,651,407 | 8,421,407   | 1,201,407  | 1,011,407  | 1.47        |
| 159   | Predicted gene 13003 OS-Mus musculus GN-Gm13003 PE=1 Sv-1                                   | Ribosome                 | E9P21_MOUSE (+1)           | Rpl11            | 2,931,407 | 2,131,407 | 3,131,407 | 4,871,407   | 5,251,407  | 5,071,407  | 1.85        |
| 160   | 40S ribosomal protein S20 OS-Mus musculus GN-Rps20 PE=1 Sv-1                                | Ribosome                 | RS20_MOUSE                 | Rps20            | 8,441,407 | 8,741,407 | 7,151,407 | 1,321,407   | 1,271,407  | 1,221,407  | 1.75        |
| 161   | 40S ribosomal protein S12 OS-Mus musculus GN-Rps12 PE=1 Sv-1                                | Ribosome                 | F7AHE_MOUSE (+1)           | Rpl2             | 1,091,407 | 1,271,408 | 8,721,408 | 1,901,408   | 1,861,408  | 1,791,408  | 2.02        |
| 162   | 60S ribosomal protein L17 OS-Mus musculus GN-Rpl17 PE=1 Sv-1                                | Ribosome                 | FL021_MOUSE (+1)           | Rpl17            | 6,291,407 | 3,091,407 | 6,081,407 | 4,811,407   | 5,811,407  | 3,761,407  | 1.47        |
| 163   | Keratin-associated protein 8-1 OS-Mus musculus GN-Krtap8-1 PE=2 Sv-1                        | KRTAP                    | KRA81_MOUSE                | Krtap8-1         | 1,301,409 | 2,581,409 | 1,261,409 | 1,701,409   | 1,611,409  | 1,831,409  | 1.00        |
| 164   | 14-3-3 protein epsilon OS-Mus musculus GN-Wyhae PE=1 Sv-1                                   | Other proteins           | WYHA_MOUSE                 | Wyhae            | 7,151,407 | 1,091,408 | 8,631,408 | 1,561,408   | 1,581,408  | 1,581,408  | 1.76        |
| 165   | Serine-RNA ligase, cytoplasmic OS-Mus musculus GN-Sars PE=1 Sv-1                            | Enzymes                  | Q8K483_MOUSE (+1)          | Sars             | 2,921,000 | 1,311,400 | 3,651,000 | 3,151,400   | 1,811,400  | 2,071,400  | 2.65        |
| 166   | 40S ribosomal protein S28 OS-Mus musculus GN-Rps28 PE=1 Sv-1                                | Ribosome                 | RS28_MOUSE                 | Rps28            | 4,611,407 | 4,711,407 | 4,811,407 | 4,911,407   | 7,811,407  | 7,011,407  | 1.33        |
| 167   | 60S ribosomal protein L18a (Fragment) OS-Mus musculus GN-Rpl18a PE=1 Sv-1                   | Ribosome                 | A0A1D5R8M5_MOUSE (+1)      | Rpl18a           | 2,391,407 | 1,401,407 | 2,221,407 | 4,541,407   | 3,711,407  | 6,111,407  | 1.81        |
| 168   | 40S ribosomal protein S25 OS-Mus musculus GN-Rps25 PE=1 Sv-1                                | Ribosome                 | A0A1110A8_MOUSE (+1)       | Rps25            | 4,011,407 | 5,101,407 | 4,851,407 | 9,701,407   | 9,041,407  | 3,971,407  | 2.74        |
| 169   | Eukaryotic translation initiation factor 4 gamma 1 OS-Mus musculus GN-EIf4G1 PE=1 Sv-1      | Translation factors      | A0AD9YV55_MOUSE (+5)       | EIf4G1           | 2,971,500 | 6,941,500 | 1,841,500 | 4,961,500   | 1,141,500  | 1,321,500  | 2.84        |
| 170   | Eukaryotic translation initiation factor 3 subunit gamma OS-Mus musculus GN-EIf3G PE=1 Sv-1 | Translation factors      | EIf3G_MOUSE                | EIf3g            | 3,851,407 | 4,821,407 | 3,681,407 | 5,181,407   | 4,441,407  | 3,441,407  | 1.04        |
| 171   | Eukaryotic translation initiation factor 3 subunit M OS-Mus musculus GN-EIf3M PE=1 Sv-1     | Translation factors      | EIf3M_MOUSE                | EIf3m            | 1,771,407 | 2,831,407 | 1,881,407 | 4,351,407   | 5,211,407  | 3,911,407  | 2.19        |
| 172   | 60S ribosomal protein L14 OS-Mus musculus GN-Rpl14 PE=1 Sv-1                                | Ribosome                 | RL14_MOUSE                 | Rpl14            | 1,801,407 | 4,621,407 | 2,151,407 | 4,001,407</ |            |            |             |

| #   | Identified proteins                                                                                 | Protein group            | Accession number             | Symbol    | WT1        | WT2        | WT3        | KO1        | KO2        | KO3        | Ratio KO/WT |
|-----|-----------------------------------------------------------------------------------------------------|--------------------------|------------------------------|-----------|------------|------------|------------|------------|------------|------------|-------------|
| 265 | T-complex protein 1 subunit epsilon OS=Mus musculus GN-Ctcs Pe1 Sv=1                                | Chaperonin               | TFPE_MOUSE                   | Ctcs      | 801520     | 1654700    | 1144700    | 6429300    | 7487700    | 8088100    | 79          |
| 266 | Protein S100-A4 OS=Mus musculus GN-S100A4 Pe1 Sv=1                                                  | Chaperonin               | S100A4_MOUSE                 | S100a4    | 9,195,077  | 1,022,108  | 8,796,407  | 7,174,402  | 8,448,407  | 0,77       |             |
| 267 | Isomorph 3 of Probable hydrolase PNPD OS=Mus musculus GN-Pnkld                                      | Enzymes                  | sp G6PZ3-3 PNPD_MOUSE (+2)   | Pnkld     | 6,32e+07   | 2,98e+07   | 6,47e+07   | 5,59e+07   | 6,21e+07   | 2,73e+07   | 0,92        |
| 268 | Dehydrogenase/reductase SDR family member 1 OS=Mus musculus GN-Dhrs1 Pe1 Sv=1                       | Enzymes                  | DHR1_MOUSE                   | Dhrs1     | 6054000    | 9938100    | 4620200    | 2,03e+07   | 1,89e+07   | 3,14e+07   | 3,43        |
| 269 | T-complex protein 1 subunit gamma OS=Mus musculus GN-Ctcs Pe1 Sv=1                                  | Chaperonin               | ESG13_MOUSE (+1)             | Ctcs3     | 0          | 0          | 0          | 1,40e+07   | 2,13e+07   | 1,41e+07   | 105,34      |
| 270 | Creatine kinase B-type OS=Mus musculus GN-Ckpb Pe1 Sv=1                                             | Cy                       | KRIB_MOUSE                   | Ckb       | 495,110    | 276,800    | 537,300    | 1,38e+07   | 1,45e+07   | 1,45e+07   | 3,42        |
| 271 | Zinc finger protein 651 (Fragment) OS=Mus musculus GN-Zfp651 Pe1 Sv=1                               | Other proteins           | A01118T6_MOUSE               | Zfp651    | 1,14e+07   | 4,43e+06   | 883,300    | 5,15e+06   | 380,250    | 47,900     | 0,56        |
| 272 | Rho GDP-dissociation inhibitor 1 OS=Mus musculus GN-Arhdga Pe1 Sv=1                                 | Other proteins           | GDIR1_MOUSE                  | Arhdga    | 388,720    | 1,42e+07   | 859,810    | 1,18e+07   | 1,36e+07   | 1,99e+07   | 1,70        |
| 273 | Isomorph 1 of Protein transport protein 12 OS=Mus musculus GN-Vtdc1                                 | Other proteins           | sp Q0283-1 H2AY_MOUSE (+1)   | Atprc1    | 46,076,000 | 11,871,000 | 23,324,000 | 26,572,000 | 12,175,000 | 12,175,000 | 0,55        |
| 274 | Eukaryotic translation initiation factor 3 subunit 1 OS=Mus musculus GN-Eif3b Pe1 Sv=1              | Translation factors      | EIF3_MOUSE                   | Eif3b     | 306,420    | 349,340    | 358,440    | 1,08e+07   | 9,193,000  | 8,892,000  | 2,81        |
| 275 | Protein FAM83H OS=Mus musculus GN-Fam83h Pe1 Sv=1                                                   | Other proteins           | FAM8H_MOUSE                  | Fam83h    | 3,174,500  | 1,15e+07   | 4,526,500  | 4,045,000  | 625,290    | 74,020     | 0,92        |
| 276 | Histone H1.0 OS=Mus musculus GN-H10 Pe2 Sv=2                                                        | Histones                 | H10_MOUSE                    | H10       | 2,01e+07   | 2,41e+07   | 2,88e+07   | 3,03e+07   | 2,64e+07   | 2,94e+07   | 1,18        |
| 277 | Protein S100-A11 OS=Mus musculus GN-S100A11 Pe1 Sv=1                                                | Other proteins           | S100A11_MOUSE                | S100a11   | 5,19e+07   | 8,93e+07   | 5,85e+07   | 4,58e+07   | 4,47e+07   | 1,08e+08   | 1,11        |
| 278 | Keratin-associated protein 22-2 OS=Mus musculus GN-Krtap22-2 Pe4 Sv=1                               | KRTAP                    | J30N6_MOUSE                  | Krtap22-2 | 1,67e+08   | 1,46e+08   | 1,28e+08   | 1,28e+08   | 1,36e+07   | 1,23e+08   | 0,63        |
| 279 | 14-3-3 protein gamma OS=Mus musculus GN-Ywhag Pe1 Sv=2                                              | Other proteins           | I43G_MOUSE                   | Ywhag     | 6,89e+07   | 1,08e+08   | 8,32e+07   | 1,44e+08   | 1,47e+08   | 1,60e+08   | 1,75        |
| 280 | Thioredoxin domain-containing protein 17 OS=Mus musculus GN-Tndc17 Pe1 Sv=1                         | Other proteins           | TXD17_MOUSE                  | Tndc17    | 1,39e+07   | 1,89e+07   | 1,06e+07   | 7,97e+07   | 4,84e+07   | 3,80e+07   | 2,85        |
| 281 | 60S ribosomal protein L22 OS=Mus musculus GN-Rpl22 Pe2 Sv=2                                         | Ribosome                 | 60S_L22_MOUSE                | Rpl22     | 1,38e+07   | 7,80e+07   | 6,53e+07   | 6,83e+07   | 4,33e+07   | 1,32e+08   | 1,13        |
| 282 | Proteinoglycan activator inhibitor 1 RNA-binding protein OS=Mus musculus GN-Serip1 Pe1 Sv=1         | Other proteins           | A0DNM5Y2_MOUSE (+4)          | Serip1    | 5,887,200  | 831,080    | 689,450    | 1,12e+07   | 1,11e+07   | 1,19e+07   | 1,49        |
| 283 | Tropomyosin alpha-3 chain OS=Mus musculus GN-Tpm3 Pe1 Sv=1                                          | Filaments                | Z23E6_MOUSE (+2)             | Tpm3      | 28,998,000 | 0          | 3,179,500  | 74,020,000 | 1,10e+07   | 1,06e+07   | 4,79        |
| 284 | Eukaryotic translation initiation factor 3 subunit D OS=Mus musculus GN-Eif3d Pe1 Sv=1              | Translation factors      | EIF3_MOUSE                   | Eif3d     | 2,267,500  | 6,755,000  | 4,268,600  | 694,290    | 1,27e+07   | 877,020    | 2,14        |
| 285 | Isomorph 1 of Core histone H2a.1 OS=Mus musculus GN-H2afv                                           | Histones                 | sp Q90Z08-1 H2AY_MOUSE (+1)  | H2afv     | 97,900,000 | 1,89e+07   | 1,03e+07   | 1,32e+07   | 1,68e+07   | 1,71e+07   | 1,00        |
| 286 | Isomorph 3 of Programmed cell death 6-interacting protein OS=Mus musculus GN-Pdcd6ip                | Other proteins           | sp Q9VU78-1 PDC6I_MOUSE (+1) | Pdcd6ip   | 265,300    | 367,770    | 316,500    | 257,300    | 571,800    | 572,900    | 1,48        |
| 287 | Actin-related protein 3 OS=Mus musculus GN-Acr3 Pe1 Sv=3                                            | Filaments                | ARP3_MOUSE                   | Actr3     | 3,013,200  | 431,880    | 619,800    | 2,07e+07   | 2,19e+07   | 2,55e+07   | 5,00        |
| 288 | Protein S100-A4 (Fragment) OS=Mus musculus GN-S100A4 Pe4 Sv=1                                       | Other proteins           | A0AG02G2_MOUSE (+1)          | S100a4    | 3,11e+07   | 6,64e+07   | 2,42e+07   | 4,88e+07   | 3,75e+07   | 6,39e+07   | 1,23        |
| 289 | T-complex protein 1 subunit epsilon OS=Mus musculus GN-Ctcs Pe4 Sv=1                                | Chaperonin               | ESG13_MOUSE (+1)             | Ctcs3     | 1,310,000  | 966,900    | 877,800    | 623,100    | 974,700    | 974,700    | 1,23        |
| 290 | 60S ribosomal protein L38 OS=Mus musculus GN-Rpl38 Pe1 Sv=3                                         | Ribosome                 | RPL38_MOUSE                  | Rpl38     | 1,62e+07   | 4,70e+07   | 1,11e+07   | 9,30e+07   | 4,73e+07   | 5,43e+07   | 1,29        |
| 291 | Serpin B11 OS=Mus musculus GN-Serpinb11 Pe1 Sv=1                                                    | Other proteins           | SRB11_MOUSE                  | Serpinb11 | 3,309,500  | 9,561,800  | 3,942,700  | 354,810    | 721,340    | 1,25e+07   | 1,89        |
| 292 | Protein Ribonuclease H1 OS=Mus musculus GN-Rhn1 Pe1 Sv=1                                            | Other proteins           | RYH1_MOUSE (+1)              | Rhn1      | 49,630     | 119,630    | 38,570     | 4,35e+07   | 4,35e+07   | 4,35e+07   | 27,37       |
| 293 | Endoplasmic reticulum protein 4 OS=Mus musculus GN-Erpd1 Pe1 Sv=2                                   | Other proteins           | ENPL_MOUSE                   | Erpd1     | 217,620    | 155,900    | 290,450    | 1,27e+07   | 9,648,000  | 5,808,100  | 4,24        |
| 294 | Translationally-controlled tumor protein OS=Mus musculus GN-Tcpt1 Pe1 Sv=1                          | Other proteins           | TCTP_MOUSE                   | Tcpt1     | 2,22e+07   | 3,35e+07   | 3,08e+07   | 3,49e+07   | 2,44e+07   | 6,70e+07   | 1,46        |
| 295 | 60S ribosomal protein L35 OS=Mus musculus GN-Rpl35 Pe1 Sv=1                                         | Ribosome                 | RPL35_MOUSE                  | Rpl35     | 4,82e+07   | 1,07e+07   | 7,97e+07   | 1,03e+08   | 9,87e+07   | 2,71e+07   | 2,15        |
| 296 | Keratin-associated protein 2-5 OS=Mus musculus GN-Krtap2-5 Pe1 Sv=1                                 | Other proteins           | KRTAP2-5_MOUSE               | Krtap2-5  | 3,22e+07   | 6,75e+07   | 4,71e+07   | 1,67e+07   | 6,61e+07   | 5,65e+07   | 1,22        |
| 297 | Eukaryotic translation initiation factor 5 OS=Mus musculus GN-Eif5 Pe1 Sv=1                         | Translation factors      | EIF5_MOUSE                   | Eif5      | 49,400     | 254,960    | 60,590     | 2,40e+07   | 2,845,500  | 50,940     | 2,82        |
| 298 | Non-canonical poly(A) RNA polymerase PAPD5 OS=Mus musculus GN-Papd5 Pe1 Sv=1                        | Enzymes                  | E0QTU_MOUSE (+3)             | Papd5     | 93,520,000 | 1,59e+07   | 290,200    | 702,400    | 368,290    | 454,800    | 0,54        |
| 299 | Fatty acyl synthase OS=Mus musculus GN-Fasn Pe1 Sv=1                                                | Enzymes                  | AD04J1R1_MOUSE (+1)          | Fasn      | 66,220     | 62,590     | 59,300     | 1,72e+08   | 1,602,000  | 49,660     | 4,52        |
| 300 | Armenin A7 OS=Mus musculus GN-Arn7 Pe1 Sv=1                                                         | Other proteins           | ARN7_MOUSE                   | Arn7      | 40,820     | 46,580     | 749,400    | 4,02e+07   | 4,02e+07   | 680,100    | 1,22        |
| 301 | Beta-hexosaminidase subunit beta OS=Mus musculus GN-Hexb Pe1 Sv=2                                   | Enzymes                  | HEXB_MOUSE                   | Hexb      | 363,800    | 497,400    | 404,100    | 507,600    | 627,500    | 661,910    | 1,42        |
| 302 | Lamin-B1 OS=Mus musculus GN-Lmn1b Pe1 Sv=3                                                          | Other proteins           | LMBN1_MOUSE                  | Lmn1b     | 4,853,800  | 1,21e+07   | 4,648,800  | 8,200,000  | 1,22e+07   | 1,21e+07   | 1,51        |
| 303 | 4-05 ribosomal protein S21 OS=Mus musculus GN-Rps21 Pe1 Sv=1                                        | Ribosome                 | RS21_MOUSE                   | Rps21     | 2,37e+07   | 959,940    | 1,40e+07   | 1,50e+07   | 3,02e+07   | 66,880     | 1,10        |
| 304 | T-complex protein 1 subunit alpha OS=Mus musculus GN-Ctcf Pe1 Sv=3                                  | Chaperonin               | CTCF_MOUSE                   | Ctcf      | 0          | 0          | 0          | 773,500    | 647,800    | 422,820    | 16,02       |
| 305 | T-complex protein 1 subunit theta OS=Mus musculus GN-Ctth Pe1 Sv=3                                  | Chaperonin               | CTTH_MOUSE                   | Ctth      | 0          | 0          | 0          | 594,700    | 617,800    | 72,900     | >30,00      |
| 306 | Serine protease inhibitor Kazal-type C OS=Mus musculus GN-Spnk6 Pe2 Sv=1                            | Other proteins           | ISK6_MOUSE                   | Spnk6     | 4,43e+07   | 2,98e+07   | 4,45e+07   | 3,82e+07   | 4,21e+07   | 1,96e+07   | 0,84        |
| 307 | Heterogeneous nuclear ribonucleoprotein K OS=Mus musculus GN-Hnrnpk Pe1 Sv=1                        | Other proteins           | BZM1R6_MOUSE (+4)            | Hnrnpk    | 199,600    | 689,200    | 516,100    | 7,27e+07   | 897,100    | 371,410    | 1,27        |
| 308 | Deoxythiokinase-1-like OS=Mus musculus GN-Dt1 Pe1 Sv=1                                              | Enzymes                  | DNTK1_MOUSE (+2)             | Dt1       | 0          | 0          | 0          | 6,52e+07   | 4,15e+07   | 7,03e+07   | >30,00      |
| 309 | Methionine aminopeptidase 2 OS=Mus musculus GN-Metap2 Pe1 Sv=1                                      | Enzymes                  | MPA2_MOUSE (+2)              | Metap2    | 1,765,300  | 1,19e+07   | 284,700    | 757,900    | 3,76e+07   | 55,720     | 2,21        |
| 310 | Serine/threonine-protein phosphatase PP1-alpha catalytic subunit OS=Mus musculus GN-Ppp1c1 Pe1 Sv=1 | Enzymes                  | PP1A_MOUSE (+3)              | Ppp1c1    | 862,540    | 1,07e+07   | 7,986,300  | 1,13e+07   | 1,14e+07   | 1,20e+07   | 1,29        |
| 311 | Adenylyl cyclase-associated protein 1 OS=Mus musculus GN-Acap1 Pe1 Sv=4                             | Other proteins           | ACAP1_MOUSE (+3)             | Cap1      | 221,800    | 2,13e+07   | 415,560    | 1,00e+07   | 1,11e+07   | 1,11e+07   | 0,87        |
| 312 | Ras-related protein Rab-18 OS=Mus musculus GN-Rab18 Pe1 Sv=1                                        | Filaments                | RAB18_MOUSE                  | Rab18     | 0          | 0          | 706,400    | 1,36e+07   | 1,36e+07   | 1,11e+07   | 22,07       |
| 313 | Filamin-B OS=Mus musculus GN-Flnb Pe1 Sv=3                                                          | Filaments                | FLNB_MOUSE                   | Flnb      | 26,730     | 56,900     | 49,860     | 1,60e+07   | 2,845,000  | 4,847,100  | 2,03        |
| 314 | Cytochrome c oxidase subunit 2 OS=Mus musculus GN-Mtco2 Pe1 Sv=1                                    | Enzymes                  | CO2_MOUSE                    | Mtco2     | 1,11e+07   | 1,69e+07   | 50,900     | 1,71e+07   | 1,74e+07   | 2,99e+07   | 2,08        |
| 315 | Creatine kinase A1 OS=Mus musculus GN-Ckmi1 Pe1 Sv=1                                                | Enzymes                  | CKA1_MOUSE                   | Ckmi1     | 2,83e+07   | 2,18e+07   | 2,18e+07   | 1,28e+07   | 1,28e+07   | 1,95e+07   | 2,41        |
| 316 | T-complex protein 1 subunit eta OS=Mus musculus GN-Ctcf Pe1 Sv=1                                    | Chaperonin               | CTCF_MOUSE                   | Ctcf      | 7,732,900  | 1,95e+02   | 251,820    | 6,67e+04   | 1,13e+07   | 8,021,000  | 1,10        |
| 317 | Isomorph 2 of Sarcolemmal/endoplasmic reticulum calcium ATPase 2 OS=Mus musculus GN-At2p24          | Enzymes                  | sp O55143-2 AT2A2_MOUSE (+1) | At2p24    | 0          | 0          | 0          | 4,26e+09   | 4,88e+08   | 5,27e+08   | >30,00      |
| 318 | Histone H2A.V OS=Mus musculus GN-H2afv Pe1 Sv=1                                                     | Histones                 | H2AV_MOUSE (+1)              | H2afv     | 4,30e+08   | 4,94e+08   | 4,55e+08   | 6,84e+08   | 8,44e+08   | 3,54e+08   | 1,35        |
| 319 | Predicted gene G358 OS=Mus musculus GN-G358 Pe1 Sv=1                                                | Other proteins           | AD067W9M_MOUSE (+4)          | Fam635h   | 9,27e+08   | 2,11e+08   | 1,34e+08   | 1,71e+08   | 1,45e+08   | 1,45e+08   | 1,12        |
| 320 | Keratin, type I cytoskeletal 28 OS=Mus musculus GN-Krt28 Pe1 Sv=1                                   | Keratins                 | K12C_MOUSE                   | Krt28     | 4,86e+08   | 1,51e+08   | 4,99e+08   | 3,52e+08   | 1,60e+08   | 1,29e+08   | 0,56        |
| 321 | 6-phosphogluconate dehydrogenase, decarboxylating OS=Mus musculus GN-Pgd Pe1 Sv=1                   | Enzymes                  | PGD_MOUSE                    | Pgd       | 134,280    | 2,103,500  | 234,300    | 300,700    | 357,500    | 501,200    | 2,00        |
| 322 | Trifunctional enzyme subunit alpha, mitochondrial OS=Mus musculus GN-Hadha Pe1 Sv=1                 | Enzymes                  | ECHA_MOUSE                   | Hadha     | 961,330    | 451,120    | 388,780    | 77,290     | 1,09e+07   | 49,930     | 2,49        |
| 323 | Threonine-1 ligase, cytoplasmic OS=Mus musculus GN-Th1 Pe1 Sv=1                                     | Other proteins           | VT53_MOUSE                   | Th1       | 1,18e+07   | 1,93e+07   | 2,407,300  | 2,81e+07   | 2,407,300  | 2,81e+07   | 2,49        |
| 324 | Vacuolar protein sorting-associated protein 35 OS=Mus musculus GN-Vps35 Pe1 Sv=1                    | Other proteins           | VPS35_MOUSE                  | Vps35     | 1,075,300  | 259,600    | 0          | 1,64e+06   | 1,85e+06   | 1,207,000  | 1,29        |
| 325 | Calmodulin-like protein 3 OS=Mus musculus GN-Calm3 Pe2 Sv=1                                         | Other proteins           | CALM3_MOUSE                  | Calm3     | 1,54e+07   | 6,95e+07   | 1,36e+07   | 4,00e+08   | 7,57e+07   | 1,27e+08   | 3,08        |
| 326 | Aspartate aminotransferase, mitochondrial OS=Mus musculus GN-Goat2 Pe1 Sv=1                         | Enzymes                  | AALT_MOUSE                   | Goat2     | 622,180    | 2,151,200  | 1,380,400  | 1,25e+08   | 358,780    | 576,720    | 3,28        |
| 327 | Alpha-crystallin OS=Mus musculus GN-Acr1 Pe1 Sv=1                                                   | Other proteins           | ACTC_MOUSE                   | Acr1      | 502,200    | 1,93e+07   | 4,85e+06   | 1,03e+07   | 4,98e+06   | 42,710     | 1,00        |
| 328 | Actin-related protein 2/3 complex subunit 4 OS=Mus musculus GN-Arpd4 Pe1 Sv=3                       | Other proteins           | ARPD4_MOUSE                  | Arpd4     | 775,200    | 786,400    | 458,840    | 2,58e+07   | 2,39e+07   | 1,51e+07   | 3,21        |
| 329 | Plectin OS=Mus musculus GN-Plec Pe1 Sv=1                                                            | Cell junctional proteins | IQ3V4_MOUSE (+16)            | Plec      | 29,980     | 19,540     | 46,140     | 3,75e+06   | 20,290     | 17,450     | 6,79        |
| 330 | Transgelin 2 OS=Mus musculus GN-Tagn2 Pe1 Sv=4                                                      | Other proteins           | TAGL2_MOUSE                  | Tagn2     | 2,552,300  | 0          | 2,950,500  | 1,08e+07   | 1,22e+07   | 1,27e+07   | 6,73        |
| 331 | T-complex protein 1 subunit beta OS=Mus musculus GN-Ctcf Pe1 Sv=1                                   | Chaperonin               | CTCF_MOUSE                   | Ctcf      | 0          | 0          | 0          | 984,600    | 946,600    | 946,600    | >30,00      |
| 332 | Ubiquitin carboxyl-terminal hydrolase isozyme L3 OS=Mus musculus GN-Uch3 Pe1 Sv=2                   | Enzymes                  | UCH3_MOUSE                   | Uch3      | 2,273,700  | 500,300    | 1,900,000  | 860,930    | 1,23e+07   | 6,233,000  | 3,03        |
| 333 | Glycolipid transfer protein OS=Mus musculus GN-Gltip Pe1 Sv=3                                       | Other proteins           | G1TP_MOUSE                   | Gltip     | 1,857,700  | 3,265,800  | 1,587,300  | 3,263,300  | 5,405,800  | 1,01e+07   | 2,79        |
| 334 | Cell division control protein 5 OS=Mus musculus GN-Cdc42 Pe1 Sv=2                                   | Other proteins           | CDK21_MOUSE (+4)             | Cdc42     | 1,024,900  | 2,100,400  | 4,350,000  | 4,96e+06   | 5,14e+06   | 5,10e+06   | 1,00        |
| 335 | MCC119409 OS=Mus musculus GN-Spr2b Pe2 Sv=1                                                         | Other proteins           | AGT7Y_MOUSE (+1)             | Spr2b     | 781,900    | 0          | 1,09e+07   | 6,21e+04   | 1,99e+07   | 20,900     | 1,55        |
| 336 | Eukaryotic translation initiation factor 5B OS=Mus musculus GN-Eif5b Pe1 Sv=1                       | Translation factors      | IF5B_MOUSE                   | Eif5b     | 150,800    | 247,540    | 505,650    | 347,400    | 369,630    | 372,000    | 2,43        |
| 337 | Phosphate carrier protein, mitochondrial OS=Mus musculus GN-Slc25a3 Pe1 Sv=1                        | Other proteins           | MCPC_MOUSE                   | Slc25a3   | 254,790    | 340,800    | 216,600    | 71,290     | 1,05e+07   | 70,890     | 3,11        |
| 338 | N-type protein 8, brain isoform OS=Mus musculus GN-Np8 Pe1 Sv=1                                     | Other proteins           | NP8_MOUSE                    | Np8       | 3,199,100  | 2,191,000  | 2,191,000  | 1,96e      |            |            |             |



| #   | Identified proteins                                                                                         | Protein group            | Accession number                     | Symbol                               | WT1       | WT2       | WT3       | KO1       | KO2       | KO3       | Ratio KO/WT |      |
|-----|-------------------------------------------------------------------------------------------------------------|--------------------------|--------------------------------------|--------------------------------------|-----------|-----------|-----------|-----------|-----------|-----------|-------------|------|
| 435 | Dolichyl-diphosphooligocharide-protein glycosyltransferase subunit 1 OS-Musculus musculus GN=Rpn1 PE=1 SV=1 | Enzymes                  | RPN1_MOUSE                           | Rpn1                                 | 0         | 0         | 128260    | 652150    | 171380    | 0         | >30.00      |      |
| 436 | ε-couglarin dehydrogenase mitochondrial OS-Musculus musculus GN=Oglth PE=1 SV=1                             | Enzymes                  | OGLTH_MOUSE                          | Oglth                                | 368480    | 421840    | 0         | 883817    | 224870    | 153870    | 3.32        |      |
| 437 | Isomorph 2 of Eukaryotic peptide chain release factor GTP-binding subunit EF3A OS-Musculus musculus GN=Gsp1 | Translation factors      | sp Q8R050-2 ERF3A_MOUSE (+1) Gsp1    | sp Q8R050-2 ERF3A_MOUSE (+1) Gsp1    | 2005800   | 812770    | 0         | 658920    | 409920    | 188380    | 2.36        |      |
| 438 | ADP-ribosylation factor-like protein 8B OS-Musculus musculus GN=Arf8b PE=1 SV=1                             | Other proteins           | A00M4SV8_MOUSE (+3)                  | Arf8b                                | 6439700   | 0         | 5697100   | 8146700   | 1,146,407 | 0         | 1.61        |      |
| 439 | Glutathione S-transferase omega-1 OS-Musculus musculus GN=Gstomega1 PE=1 SV=2                               | Enzymes                  | GSTO1_MOUSE                          | Gstomega1                            | 0         | 0         | 302900    | 3185400   | 1,354,700 | 0         | 6.04        |      |
| 440 | ε-factin-capping protein subunit beta (Fragmen OS-Musculus musculus GN=Cappb PE=1 SV=6                      | Other proteins           | CAPB_MOUSE                           | Cappb                                | 4546100   | 1,135,407 | 762900    | 1,085,430 | 2,475,407 | 1,626,407 | >30.00      |      |
| 441 | Obj like ATPase 1 OS-Musculus musculus GN=Obj1 PE=1 SV=1                                                    | Enzymes                  | BI14Y9_MOUSE (+2)                    | Obj1                                 | 0         | 219390    | 2488800   | 1879400   | 0         | 468880    | 1.61        |      |
| 442 | Protein transport protein Sec23B (Fragmen OS-Musculus musculus GN=Sec23b PE=1 SV=1                          | Other proteins           | AZANA0_MOUSE (+3)                    | Sec23b                               | 904980    | 983850    | 108900    | 948510    | 1087900   | 1121500   | 1.06        |      |
| 443 | Spermatogenesis-associated protein 6 OS-Musculus musculus GN=Spat6 PE=1 SV=1                                | Other proteins           | AG0A020R0_MOUSE (+7)                 | Spat6                                | 1197700   | 1802300   | 837050    | 881830    | 1127600   | 365500    | 2.77        |      |
| 444 | MCS5400 OS-Musculus musculus GN=My12a PE=1 SV=1                                                             | Other proteins           | QZWQ09_MOUSE                         | My12a                                | 0         | 0         | 1,796,407 | 1,088,407 | 627160    | 35,100    | 3.10        |      |
| 445 | Ectonucleoside triphosphate carrier protein 1 OS-Musculus musculus GN=Ectcp1 PE=1 SV=2                      | Other proteins           | ETA_MOUSE                            | Ectcp1                               | 0         | 0         | 1174110   | 495550    | 343040    | 929560    | 15.00       |      |
| 446 | Proteasome subunit alpha type-5 OS-Musculus musculus GN=Psma5 PE=1 SV=1                                     | Proteasome               | Psm5_MOUSE                           | Psm5                                 | 0         | 0         | 2151600   | 491860    | 562950    | 1,578,407 | 12.20       |      |
| 447 | Eukaryotic translation initiation factor 3 subunit B OS-Musculus musculus GN=EIF3b PE=1 SV=1                | Translation factors      | P027_MOUSE                           | EIF3b                                | 0         | 0         | 1,221,407 | 765,120   | 20,510    | 515010    | >30.00      |      |
| 448 | Costamer subunit delta OS-Musculus musculus GN=Arcln1 PE=1 SV=2                                             | Other proteins           | CPO4_MOUSE                           | Arcln1                               | 0         | 0         | 1304600   | 1642800   | 983900    | >30.00    | >30.00      |      |
| 449 | Actin-related protein 1A OS-Musculus musculus GN=Arpc1a PE=1 SV=1                                           | Filaments                | ARPC1A_MOUSE                         | Arpc1a                               | 0         | 0         | 1710900   | 807690    | 247400    | 512850    | 174000      | 3.69 |
| 450 | Valine-tRNA ligase (Fragmen OS-Musculus musculus GN=Vars PE=1 SV=1                                          | Enzymes                  | G3UY93_MOUSE (+1)                    | Vars                                 | 0         | 0         | 638220    | 304460    | 206200    | 165890    | 182040      | 5.90 |
| 451 | Ras-related protein 3/3 complex subunit 3 OS-Musculus musculus GN=Rpp3 PE=1 SV=1                            | Other proteins           | ES2R3_MOUSE (+4)                     | Rpp3                                 | 3191200   | 201500    | 1449400   | 1005400   | 675680    | 238700    | 7.42        |      |
| 452 | 26S proteasome non-ATPase regulatory subunit 13 OS-Musculus musculus GN=Psm13 PE=1 SV=1                     | Proteasome               | Psm13_MOUSE                          | Psm13                                | 514400    | 0         | 627410    | 216700    | 226900    | 424610    | 7.42        |      |
| 453 | Three prime repair exonuclease 2 OS-Musculus musculus GN=Trex2 PE=2 SV=1                                    | Enzymes                  | TREX2_MOUSE                          | Trex2                                | 1838700   | 736100    | 4043000   | 193110    | 512280    | 548750    | 0.75        |      |
| 454 | Glutathione S-transferase mu 5 OS-Musculus musculus GN=Gstm5 PE=1 SV=1                                      | Enzymes                  | EP9V6_MOUSE (+2)                     | Gstm5                                | 3013200   | 870200    | 242460    | 642630    | 398800    | 454980    | 1.05        |      |
| 455 | GIS ribosomal protein L18 OS-Musculus musculus GN=Rp18a PE=1 SV=2                                           | Ribosome                 | RPL18A_MOUSE                         | Rp18a                                | 595500    | 202600    | 505500    | 0         | 293340    | 479460    | 0.59        |      |
| 456 | Heterogeneous nuclear ribonucleoprotein L (Fragmen OS-Musculus musculus GN=Hnrnpl PE=1 SV=1                 | Ribosome                 | GS924_MOUSE (+1)                     | Hnrnpl                               | 1003500   | 504130    | 322950    | 314720    | 287600    | 245080    | 0.91        |      |
| 457 | ATP synthase subunit f1, mitochondrial OS-Musculus musculus GN=Atp5f1 PE=1 SV=3                             | Enzymes                  | ATPK_MOUSE (+1)                      | Atp5f1                               | 3422800   | 955520    | 483130    | 663300    | 803260    | 918480    | 1.45        |      |
| 458 | Isomorph 2 of 60S ribosomal protein L22-like 1 OS-Musculus musculus GN=Rpl22l1                              | Ribosome                 | sp Q2R757-2 RL22L_MOUSE (+1) Rpl22l1 | sp Q2R757-2 RL22L_MOUSE (+1) Rpl22l1 | 386200    | 456620    | 392160    | 345300    | 617300    | 834180    | 1.61        |      |
| 459 | Costamer subunit gamma OS-Musculus musculus GN=Psma4 PE=1 SV=1                                              | Proteasome               | Psm4_MOUSE (+1)                      | Psma4                                | 223000    | 0         | 0         | 985290    | 721170    | 113690    | 30.02       |      |
| 460 | Serine/threonine-protein kinase N3 (Fragmen OS-Musculus musculus GN=Pkn3 PE=1 SV=1                          | Proteasome               | AZ8B6_MOUSE (+1)                     | Pkn3                                 | 1,928,407 | 2,966,407 | 1,838,407 | 1,87500   | 2,188,407 | 0         | 0.35        |      |
| 461 | Evlopin OS-Musculus musculus GN=Evpl PE=1 SV=3                                                              | Cell junctional proteins | EVPL_MOUSE                           | Evpl                                 | 111980    | 20280     | 786080    | 0         | 37790     | 0         | 0.34        |      |
| 462 | Heat shock 70 kDa protein 1 OS-Musculus musculus GN=Hsp70a PE=1 SV=1                                        | Enzymes                  | HSP70A_MOUSE (+1)                    | Hsp70a                               | 0         | 0         | 167900    | 864730    | 0         | 192590    | 2.29        |      |
| 463 | Ras-related protein Rab-25 OS-Musculus musculus GN=Raab25 PE=1 SV=2                                         | Other proteins           | RAB25_MOUSE                          | Rab25                                | 1117600   | 295920    | 1345900   | 1,358,407 | 0         | 655990    | 3.70        |      |
| 464 | Dolichyl-diphosphooligocharide-protein glycosyltransferase subunit 2 OS-Musculus musculus GN=Rpn2 PE=1 SV=1 | Enzymes                  | AZACG7_MOUSE (+1)                    | Rpn2                                 | 0         | 0         | 158820    | 364730    | 165520    | 332800    | 5.47        |      |
| 465 | ATP-binding cassette sub-family E member 1 OS-Musculus musculus GN=Abca1 PE=1 SV=1                          | Other proteins           | ABCE1_MOUSE                          | Abce1                                | 0         | 0         | 0         | 93180     | 23150     | 426050    | >30.00      |      |
| 466 | Importin-7 OS-Musculus musculus GN=Import7 PE=1 SV=2                                                        | Other proteins           | IMP7_MOUSE                           | Import7                              | 0         | 0         | 126800    | 4005      | 0         | 0         | 7.26        |      |
| 467 | Synaptic vesicle membrane protein VAMP1 homolog OS-Musculus musculus GN=Vamp1 PE=1 SV=3                     | Other proteins           | VAT1_MOUSE                           | Vat1                                 | 1206500   | 0         | 0         | 193300    | 260180    | 506810    | 2.97        |      |
| 468 | 26S proteasome non-ATPase regulatory subunit 7 OS-Musculus musculus GN=Psm7 PE=1 SV=2                       | Proteasome               | PSM7_MOUSE                           | Psm7                                 | 0         | 0         | 0         | 1,048,407 | 92760     | 817010    | >30.00      |      |
| 469 | WD repeat-containing protein 1 OS-Musculus musculus GN=Wdr1 PE=1 SV=3                                       | Other proteins           | WDR1_MOUSE                           | Wdr1                                 | 0         | 0         | 0         | 272450    | 59720     | 385260    | >30.00      |      |
| 470 | Thimet oligopeptidase OS-Musculus musculus GN=Thop1 PE=1 SV=1                                               | Enzymes                  | THOP1_MOUSE (+1)                     | Thop1                                | 432210    | 193060    | 56630     | 0         | 219780    | 30380     | 1.80        |      |
| 471 | Superoxide dismutase [Mn], mitochondrial OS-Musculus musculus GN=Sox2 PE=1 SV=3                             | Enzymes                  | SODM_MOUSE                           | Sox2                                 | 0         | 0         | 399410    | 0         | 503000    | 537790    | 92780       | 4.93 |
| 472 | Isomorph 2 of Poly(C)-binding protein 2 OS-Musculus musculus GN=Pcbp2                                       | Other proteins           | sp Q1990-2 PCBP2_MOUSE (+2) Pcbp2    | sp Q1990-2 PCBP2_MOUSE (+2) Pcbp2    | 420680    | 563840    | 437880    | 875900    | 782560    | 686530    | 1.65        |      |
| 473 | Heterogeneous nuclear ribonucleoprotein H OS-Musculus musculus GN=Hnrnp11 PE=1 SV=3                         | Other proteins           | HNHR1_MOUSE (+1)                     | Hnrnp11                              | 172880    | 186610    | 139390    | 50710     | 924390    | 0         | 0.72        |      |
| 474 | Exportin-1 OS-Musculus musculus GN=Xpo1 PE=1 SV=1                                                           | Other proteins           | XPO1_MOUSE (+1)                      | Xpo1                                 | 264700    | 0         | 202350    | 0         | 615210    | 263770    | 4.70        |      |
| 475 | Proteasome subunit alpha type-1 OS-Musculus musculus GN=Psma1 PE=1 SV=1                                     | Proteasome               | PSA1_MOUSE (+1)                      | Psm1                                 | 0         | 0         | 202900    | 0         | 254700    | 620000    | 641790      | 6.70 |
| 476 | Arachidonid 12-lipoxygenase, 12R-type OS-Musculus musculus GN=Allox12b PE=1 SV=1                            | Enzymes                  | FLXL2B_MOUSE                         | Allox12b                             | 156830    | 125970    | 0         | 738670    | 133550    | 257100    | 1.72        |      |
| 477 | G60S ribosomal protein L29 OS-Musculus musculus GN=L29 PE=1 SV=1                                            | Ribosome                 | FGL2L_MOUSE (+2)                     | L29                                  | 1,422,407 | 0         | 1,066,407 | 3,086,407 | 1,928,407 | 0         | 2.02        |      |
| 478 | Actin-related protein 2/1 complex subunit 3 OS-Musculus musculus GN=Arp2 PE=1 SV=3                          | Filaments                | ARPC2_MOUSE (+1)                     | Arp2                                 | 0         | 0         | 37980     | 32490     | 17070     | 20700     | >30.00      |      |
| 479 | Microtubule-associated protein 1A/B light chain 3B OS-Musculus musculus GN=Map1lb3 PE=1 SV=1                | Filaments                | MAP1LB_MOUSE                         | Map1lb3                              | 0         | 0         | 0         | 1,166,407 | 4,008,407 | 3,528,407 | 7.30        |      |
| 480 | Costars family protein ABRA1 (Fragmen OS-Musculus musculus GN=Abra1 PE=1 SV=1                               | Other proteins           | A0A1V2P7X0_MOUSE (+2)                | Abra1                                | 0         | 0         | 0         | 676890    | 1,368,407 | 2,368,407 | 3.00        |      |
| 481 | Ubiquitin carboxyl-terminal hydrolase 29 (Fragmen OS-Musculus musculus GN=Ubp29 PE=2 SV=1                   | Other proteins           | Q84A4_MOUSE (+1)                     | Ubp29                                | 5974200   | 0         | 7324600   | 8058900   | 1,078,407 | 61,146    | 1.46        |      |
| 482 | Protein disulfide-isomerase A6 OS-Musculus musculus GN=Pdi6a PE=1 SV=3                                      | Enzymes                  | PDI6A_MOUSE (+1)                     | Pdi6a                                | 0         | 0         | 425950    | 154460    | 68190     | >30.00    | >30.00      |      |
| 483 | Sulfotransferase OS-Musculus musculus GN=Suft2b1 PE=1 SV=1                                                  | Enzymes                  | A0A1B0G94_MOUSE (+3)                 | Suft2b1                              | 0         | 0         | 247600    | 177090    | 302700    | 58890     | 4.30        |      |
| 484 | Proteasome subunit alpha type-7 OS-Musculus musculus GN=Psma7 PE=1 SV=1                                     | Proteasome               | PSA7_MOUSE                           | Psm7                                 | 0         | 0         | 0         | 403800    | 570460    | 274300    | >30.00      |      |
| 485 | Proteasome subunit beta type-1 OS-Musculus musculus GN=Psmb5 PE=1 SV=1                                      | Proteasome               | PSMB5_MOUSE (+1)                     | Psm5                                 | 0         | 0         | 0         | 1,028,407 | 10,870    | 1,558,407 | >30.00      |      |
| 486 | ATP-dependent 6-phosphofructokinase OS-Musculus musculus GN=PFKP PE=1 SV=1                                  | Enzymes                  | Q8C6D_MOUSE (+2)                     | PFKP                                 | 0         | 0         | 0         | 100480    | 101670    | 635350    | >30.00      |      |
| 487 | Cysteine protease OS-Musculus musculus GN=Atg4b PE=1 SV=1                                                   | Enzymes                  | A0AD04J65_MOUSE (+1)                 | Atg4b                                | 326750    | 0         | 0         | 60090     | 260930    | 301500    | 12.17       |      |
| 488 | Transforming protein RhoA (Fragmen OS-Musculus musculus GN=Rhoa PE=1 SV=1                                   | Other proteins           | A0AD6V6_MOUSE (+1)                   | Rhoa                                 | 0         | 0         | 480970    | 256990    | 0         | 137900    | 1.17        |      |
| 489 | Hydroperoxidase isomerase LXCX3 OS-Musculus musculus GN=Lxcx3 PE=1 SV=2                                     | Enzymes                  | LXCX3_MOUSE                          | Lxcx3                                | 1492100   | 113870    | 215790    | 748670    | 682730    | 158200    | 3.80        |      |
| 490 | Protein phosphatase methyltransferase 1 OS-Musculus musculus GN=Ppm1 PE=1 SV=5                              | Enzymes                  | PPME1_MOUSE                          | Ppm1                                 | 552690    | 0         | 0         | 243100    | 262620    | 151400    | 11.89       |      |
| 491 | Dnal1 homolog subfamily A member 2 OS-Musculus musculus GN=Dna12a PE=1 SV=1                                 | Other proteins           | DNMA2_MOUSE                          | Dna12a                               | 0         | 0         | 743210    | 0         | 64640     | 108740    | 2.33        |      |
| 492 | ATP-binding cassette sub-family F member 2 OS-Musculus musculus GN=Abcf1 PE=1 SV=1                          | Other proteins           | ABCF1_MOUSE                          | Abcf1                                | 0         | 0         | 28620     | 131710    | 626190    | 534890    | 8.77        |      |
| 493 | Probable ATP-dependent histone H2B deubiquitinase OS-Musculus musculus GN=Ubp1 PE=1 SV=1                    | Other proteins           | Ubp1_MOUSE                           | Ubp1                                 | 657240    | 275260    | 0         | 61390     | 126460    | 217030    | 2.00        |      |
| 494 | Apoptosis-associated speck-like protein containing a CARD OS-Musculus musculus GN=Pycard PE=1 SV=1          | Other proteins           | ASC_MOUSE                            | Pycard                               | 205200    | 0         | 160220    | 238480    | 318650    | 414590    | 2.64        |      |
| 495 | Collagen alpha 1(VI) chain OS-Musculus musculus GN=Col6a1 PE=1 SV=1                                         | Other proteins           | COL6A1_MOUSE                         | Col6a1                               | 311930    | 206120    | 382560    | 437250    | 101220    | 636940    | 0.76        |      |
| 496 | Mitochondrial fission 1 protein OS-Musculus musculus GN=Mifn1 PE=1 SV=1                                     | Other proteins           | FIS1_MOUSE                           | Mifn1                                | 240030    | 41670     | 260970    | 399370    | 636250    | 570990    | 1.75        |      |
| 497 | Microtubule-associated protein 1A/B light chain 3A OS-Musculus musculus GN=Map1la3a PE=1 SV=1               | Filaments                | MAP1LA3_MOUSE                        | Map1la3a                             | 0         | 0         | 0         | 114140    | 2,848,407 | 157570    | 4.74        |      |
| 498 | Insulin-degrading enzyme (Fragmen OS-Musculus musculus GN=Id PE=1 SV=1                                      | Other proteins           | FRP9Z_MOUSE (+1)                     | Id                                   | 0         | 0         | 121750    | 0         | 331240    | 351480    | 3.16        |      |
| 499 | Proteasome subunit alpha type-4 OS-Musculus musculus GN=Psma4 PE=1 SV=1                                     | Proteasome               | PSA4_MOUSE                           | Psm4                                 | 0         | 0         | 220110    | 437340    | 895720    | 309020    | 7.46        |      |
| 500 | Testic-expressed gene 264 OS-Musculus musculus GN=Tex264 PE=1 SV=1                                          | Other proteins           | EQD37_MOUSE                          | Tex264                               | 0         | 0         | 0         | 281420    | 778990    | 0         | >30.00      |      |
| 501 | Target of Myb protein 1 OS-Musculus musculus GN=Tom1 PE=1 SV=1                                              | Other proteins           | Q8V1C_MOUSE (+3)                     | Tom1                                 | 0         | 0         | 0         | 51890     | 65120     | 0         | >30.00      |      |
| 502 | Splicing factor, proline- and glutamine-rich OS-Musculus musculus GN=SFQ PE=1 SV=1                          | Other proteins           | SFQ_MOUSE                            | Sfq                                  | 1420700   | 216660    | 162360    | 243340    | 137320    | 0         | 0.73        |      |
| 503 | Protein-unc-45 homolog 4 OS-Musculus musculus GN=Unc45 PE=1 SV=2                                            | Other proteins           | UNK45_MOUSE                          | Unc45a                               | 0         | 0         | 568370    | 212300    | 562890    | 759010    | 160140      | 1.64 |
| 504 | Eukaryotic translation initiation factor 4E OS-Musculus musculus GN=EIF4 PE=1 SV=1                          | Translation factors      | EIF4_MOUSE (+3)                      | EIF4                                 | 0         | 0         | 677330    | 0         | 352340    | 1,286,407 | >30.00      |      |
| 505 | Alpha 1-antrypsin-1 OS-Musculus musculus GN=Serpin1a PE=1 SV=1                                              | Other proteins           | A0A0AMQ34_MOUSE (+1)                 | Serpin1a                             | 947560    | 209800    | 0         | 432290    | 0         | 304100    | 2.42        |      |
| 506 | Adenylate kinase isoenzyme 1 (Fragmen OS-Musculus musculus GN=Aki1 PE=1 SV=1                                | Enzymes                  | Z4Y9F_MOUSE (+2)                     | Aki1                                 | 422650    | 0         | 0         | 1,378,407 | 0         | 779020    | 5.09        |      |
| 507 | Annein (Fragmen OS-Musculus musculus GN=Anxin1 PE=1 SV=3                                                    | Other proteins           | A0ADMSW89_MOUSE (+1)                 | Anxin4                               | 0         | 0         | 141010    | 556190    | 413620    | 1246360   | 7.76        |      |
| 508 | Transition factors 1 OS-Musculus musculus GN=EIF2b5 PE=1 SV=1                                               | Translation factors      | EIF2B5_MOUSE (+1)                    | EIF2b5                               | 259160    | 228870    | 0         | 155100    | 291460    | 205400    | 2.08        |      |
| 509 | Exportin-2 OS-Musculus musculus GN=Xpo2 PE=1 SV=1                                                           | Other proteins           | EQO179_MOUSE (+1)                    | Xpo2                                 | 4,606,407 | 6,378,407 | 4,566,407 | 4,128,407 | 0         | 5,388,407 | 0.61        |      |
| 510 | Kinesin-like protein (Fragmen OS-Musculus musculus GN=Kif5b PE=1 SV=1                                       | Enzymes                  | EQAK5_MOUSE (+1)                     | Kif5b                                | 0         | 0         | 0         | 0         | 56390     | 220030    | >30.00      |      |
| 511 | Serpin B13 OS-Musculus musculus GN=Serpinb13 PE=3 SV=1                                                      | Other proteins           | DGRH5_MOUSE (+1)                     | Serpinb13                            | 234180    | 1,296,407 | 374920    | 660710    | 802160    | 1,078,407 | 1.33        |      |
| 512 | Aitakin-2 OS-Musculus musculus GN=Aitk2 PE=1 SV=1                                                           | Other proteins           | AITK2_MOUSE (+1)                     | Aitk2                                | 0         | 0         | 217990    | 0         | 133460    | 21100     | >30.00      |      |
| 513 | Cytoskeleton-associated protein 4 OS-Musculus musculus GN=Ckap4 PE=1 SV=2                                   | Other proteins           | CKAP4_MOUSE                          | Ckap4                                | 0         | 0         | 798240    | 0         | 96200     | 638120    | >30.00      |      |
| 514 | Cytochrome b-1 complex subunit 2, mitochondrial OS-Musculus musculus GN=Uqcrc2 PE=1 SV=1                    | Other proteins           | CQR2_MOUSE                           | Uqcrc2                               | 1492300   | 205810    | 163870    | 163370    | 166660    | 410160    | 1.43        |      |
| 515 | C9orf9 OS-Musculus musculus GN=C9 PE=1 SV=2                                                                 | Other proteins           | C9_MOUSE                             | C9                                   | 336810    | 0         | 629300    | 0         | 0         | 0         | 0.00        |      |
| 516 | Importin subunit alpha 2 OS-Musculus musculus GN=Impa2 PE=1 SV=1                                            | Other proteins           | A0A8AL1Z7_MOUSE (+1)                 | Impa2                                | 795140    | 158990    | 0         | 235660    | 201460    | 332200    | >30.00      |      |
| 517 | MCG10748, isoform CRA b OS-Musculus musculus GN=Rapa1a PE=1 SV=1                                            | Other proteins           | A0A0QD2L9_MOUSE (+3)                 | Rapa1a                               | 163550    | 280940    | 283110    | 269330    | 285610    | 0         | 0.76        |      |
| 518 | Eukaryotic translation initiation factor 1A, X-chromosomal OS-Musculus musculus GN=EIF4a PE=2 SV=3          | Translation factors      | EIF1_MOUSE (+1)                      | EIF4a                                | 254980    | 0         | 0         | 419680    | 574620    | 848990    | 7.23        |      |
| 519 | AS-association 2 (Fragmen OS-Musculus musculus GN=Asa2 PE=1 SV=1                                            | Translation factors      | EIF2X_MOUSE (+1)                     | EIF2x                                | 0         | 0         | 185490    | 229610    | 288640    | 313150    | 4.48        |      |
| 520 | Isomorph 2 of Heterogeneous nuclear ribonucleoprotein U OS-Musculus musculus GN=Hnrnpu                      | Other proteins           | Q8U1_MOUSE (+2)                      | Hnrnpu                               | 284710    | 459660    | 356710    | 98190     | 126460    | 585460    | 2.09        |      |
| 521 | Peptidyl-lysine hydrolase 2, mitochondrial OS-Musculus musculus                                             |                          |                                      |                                      |           |           |           |           |           |           |             |      |

Table with columns: #, Identified proteins, Protein group, Accession number, Symbol, WT1, WT2, WT3, KO1, KO2, KO3, Ratio KO/WT. Contains data for 721 different protein entries.

Notes:

Search Engine: MaxQuant

Version: 1.5.7.4
Fragment Tolerance: 20 PPM (Monoisotopic)
Fixed Modifications: +57 on C (Carbamidomethyl)
Variable Modifications: +1 on NQ (Deamidated), +16 on M (Oxidation), +42 on n (Acetyl)
Digestion Enzyme: trypsin
Max Missed Cleavages: 2

Scaffold: Version: Scaffold\_4.8.4

Protein Grouping Strategy: Experiment-wide grouping with protein cluster analysis

Peptide Thresholds: 0.0% minimum
Protein Thresholds: 20.0% minimum and 1 peptide minimum
Peptide FDR: 0.4% (Decoy)
Protein FDR: 1.4% (Decoy)
